# Supplementary material for: Physicochemical properties of the ternary complexes of Pt(ii) with uracil and small peptide moieties: an experimental and computational study
Source: Royal Society of Chemistry journal article supplement (doi:10.1039/c5nj00120j), 2015-01-01
Supplement: c5nj00120j1.pdf [file c5nj00120j1.pdf]

## *Supporting Information*

To be published in: **New Journal of Chemistry**  
Manuscript ID: **NJ-ART-01-2015-000120**

# **Physicochemical properties of the ternary complexes of Pt(II) with uracil and small peptide moieties: an experimental and computational study**

**Shilpi Mandal<sup>a</sup>, Gunajyoti Das<sup>\*b</sup> and Hassan Askari<sup>a</sup>**

<sup>a</sup>*Centre of Advanced Study and Department of Chemistry, North-Eastern Hill University, Shillong-793022, Meghalaya, India.*

<sup>b</sup>*Department of Chemistry, Central Institute of Technology, Kokrajhar-783370, BTAD, Assam, India.*

*\*E-mail: [guna\\_das@yahoo.co.in](mailto:guna_das@yahoo.co.in)*

### **Contents:**

**Table S1.** ZPVE corrected values (scaled with 0.97) of total electronic energies<sup>a</sup> ( $E_c$ ) and Gibbs free energies ( $G_c$ ) of the systems studied in gas and aqueous phase at B3PW91 level.

**Table S2.** NPA charges on some chemically meaningful atoms of the ligands and the metal complexes calculated at B3PW91 level in aqueous phase.

**Table S3** Experimental and calculated IR spectral data (frequencies are in  $\text{cm}^{-1}$ ) of the Pt(II) complexes (theoretical gas phase values are in parentheses)

**Table S4.** Calculated bond lengths (in angstrom), bond angles and dihedral angles (in degrees) of the ligands and the metal complexes calculated at B3PW91 level in vacuum and aqueous environment.

**Table S5.** DNA binding-affinities of the three ternary complexes of Pt(II)

**Fig. S1** Experimental UV-vis spectrum of CT-DNA in aqueous phase

**Fig. S2** TG/DTA curves of the metal complexes prepared in solid state

**Fig. S3** Mass spectrum of the metal complexes prepared by solid state technique

**Fig. S4** The potential energy surfaces corresponding to the three dihedrals  $\alpha_1$ ,  $\alpha_2$  and  $\alpha_3$  of zwitterion *l*-alanyl-*l*-glutamine at B3PW91/6-31++G(d,p) level in the aqueous phase

**Fig. S5** B3PW91/6-31++G(d,p) level optimized structures of the seven possible conformers of zwitterion *l*-alanyl-*l*-glutamine corresponding to the three dihedrals  $\alpha_1$ ,  $\alpha_2$  and  $\alpha_3$  in aqueous phase (energy in Hartree)

**Fig. S6** Experimental FT-IR spectra of the ligands and their ternary complexes with Pt(II)

**Fig. S7** Experimental UV-vis spectra of the synthesized complexes in deionized water

**Fig. S8** Theoretical UV-vis spectra of the complexes in gas and aqueous phases

► Cartesian coordinates of the optimized structures of the ligands their metal complexes in gas and aqueous phases using the B3PW91 level of theory

**Table S1.** ZPVE corrected values (scaled with 0.97) of total electronic energies<sup>a</sup> ( $E_c$ ) and Gibbs free energies ( $G_c$ ) of the systems studied in gas and aqueous phase at B3PW91 level.

| Systems                  | Phases  | $E_c$        | $G_c$        | $E_c^b$      | $G_c^b$      |
|--------------------------|---------|--------------|--------------|--------------|--------------|
| Ura                      | Aqueous | -414.619174  | -414.562066  | -414.781257  | -414.724633  |
|                          | Gas     | -414.601344  | -414.544340  | -414.763147  | -414.706643  |
| GV                       | Aqueous | -609.991018  | -609.809153  | -610.223776  | -610.042676  |
|                          | Gas     | -609.972580  | -609.791439  | -610.205853  | -610.025700  |
| AG                       | Aqueous | -778.627827  | -778.422084  | -778.926281  | -778.720530  |
|                          | Gas     | -778.598825  | -778.394370  | -778.897785  | -778.694373  |
| GL                       | Aqueous | -649.025580  | -649.060411  | -649.515052  | -649.307296  |
|                          | Gas     | -649.248983  | -649.041982  | -649.496594  | -649.290600  |
| Pt(Ura)(GV)              | Aqueous | -1142.644650 | -1142.405060 | -1142.989276 | -1142.751281 |
|                          | Gas     | -1142.595199 | -1142.356582 | -1142.938910 | -1142.702006 |
| Pt(Ura)(GV) <sup>c</sup> | Aqueous | -1142.598921 | -1142.363241 | -----        | -----        |
| Pt(Ura)(AG)              | Aqueous | -1311.277350 | -1311.013695 | -1311.687335 | -1311.426340 |
|                          | Gas     | -1311.222364 | -1310.959816 | -1311.631179 | -1311.370387 |
| Pt(Ura)(GL)              | Aqueous | -1181.676176 | -1181.653861 | -1182.278333 | -1182.014216 |
|                          | Gas     | -1181.869852 | -1181.604912 | -1182.227688 | -1181.964280 |

<sup>a</sup>energies in Hartrees; <sup>b</sup>at B3LYP level; <sup>c</sup>triplet.

**Table S2.** NPA charges on some chemically meaningful atoms of the ligands and the metal complexes calculated at B3PW91 level in aqueous phase.

| Ura                  |         | GV                   | AG      | GL      |         | Pt(Ura)(GV)          | Pt(Ura)(AG) | Pt(Ura)(GL) |        |
|----------------------|---------|----------------------|---------|---------|---------|----------------------|-------------|-------------|--------|
| Atoms                | Charges | Atoms                | Charges | Charges | Charges | Atoms                | Charges     | Charges     |        |
| N <sub>15</sub>      | -0.621  | N <sub>6</sub>       | -0.821  | -0.819  | -0.821  | Pt                   | 0.843       | 0.854       | 0.840  |
| N <sub>10</sub>      | -0.664  | O <sub>7</sub>       | -0.815  | -0.793  | -0.811  | N <sub>6</sub>       | -0.852      | -0.853      | -0.854 |
| O <sub>11</sub>      | -0.662  | O <sub>8</sub>       | -0.747  | -0.767  | -0.752  | N <sub>10</sub>      | -0.653      | -0.651      | -0.654 |
| O <sub>16</sub>      | -0.674  | C <sub>1</sub>       | 0.803   | 0.811   | 0.800   | O <sub>7</sub>       | -0.786      | -0.779      | -0.792 |
| C <sub>16</sub>      | 0.813   | C <sub>2</sub>       | -0.177  | -0.179  | -0.181  | O <sub>11</sub>      | -0.671      | -0.669      | -0.670 |
| C <sub>12</sub>      | 0.643   | N <sub>3</sub>       | -0.642  | -0.652  | -0.646  | O <sub>8</sub>       | -0.672      | -0.689      | -0.670 |
| C <sub>13</sub>      | -0.407  | H(N <sub>3</sub> H)  | 0.446   | 0.443   | 0.444   | C <sub>1</sub>       | 0.824       | 0.833       | 0.819  |
| H(C <sub>13</sub> H) | 0.282   | C <sub>4</sub>       | 0.658   | 0.671   | 0.660   | C <sub>2</sub>       | -0.167      | -0.171      | -0.169 |
|                      |         | O (C <sub>4</sub> O) | -0.655  | -0.645  | -0.653  | N <sub>3</sub>       | -0.658      | -0.663      | -0.660 |
|                      |         | C <sub>5</sub>       | -0.343  | -0.155  | -0.345  | H(N <sub>3</sub> H)  | 0.463       | 0.457       | 0.465  |
|                      |         |                      |         |         |         | H(N <sub>3</sub> H)  | 0.463       | 0.457       | 0.465  |
|                      |         |                      |         |         |         | C <sub>4</sub>       | 0.679       | 0.689       | 0.679  |
|                      |         |                      |         |         |         | O (C <sub>4</sub> O) | -0.668      | -0.662      | -0.667 |
|                      |         |                      |         |         |         | C <sub>5</sub>       | -0.350      | -0.164      | -0.350 |

Atomic charges in a. u.

**Table S3** Experimental and calculated IR spectral data (frequencies are in  $\text{cm}^{-1}$ ) of the Pt(II) complexes (theoretical gas phase values are in parentheses)

| Systems     |         | $\nu(\text{N}_3\text{-H})$ | $\nu_{\text{as}}(\text{N-H})$ | $\nu_{\text{s}}(\text{N-H})$ | $\nu(\text{C}_4=\text{O})$ | $\nu_{\text{as}}(\text{COO}^-)$ | $\nu_{\text{s}}(\text{COO}^-)$ | $\nu(\text{C}_5\text{-N}_6)$ | $\nu(\text{C}_4\text{-N}_3)$ | $\nu(\text{M-O})$     | $\nu(\text{M-N})$ | $\Delta\delta$        |           |
|-------------|---------|----------------------------|-------------------------------|------------------------------|----------------------------|---------------------------------|--------------------------------|------------------------------|------------------------------|-----------------------|-------------------|-----------------------|-----------|
| GV          | Expt.   | A                          | 3428                          | 3251                         | 3071                       | 1689                            | 1625                           | 1406                         | 1132                         | 1228                  | -----             | -----                 | 219       |
|             | Theori. | I                          | 3477 (3482)                   | 3401 (3405)                  | 3332 (3321)                | 1713 (1753)                     | 1645 (1765)                    | 1344 (1326)                  | 1035 (1068)                  | 1258 (1248)           | -----             | -----                 | 301 (439) |
|             |         | II                         | 3455 (3462)                   | 3379 (3382)                  | 3315 (3307)                | 1691 (1732)                     | 1630 (1748)                    | 1358 (1329)                  | 1050 (1078)                  | 1231 (1227)           | -----             | -----                 | 272 (419) |
| Pt(Ura)(GV) | Expt.   | A                          | 3431                          | 3252                         | 3131                       | 1695                            | 1645                           | 1400                         | 1127                         | 1234                  | 527w              | 480w                  | 245       |
|             |         | B                          | 3436                          | 3259                         | 3116                       | 1717                            | 1649                           | 1400                         | 1124                         | 1236                  | 545s              | 477w                  | 249       |
|             | Theori. | I                          | 3476 (3464)                   | 3422 (3465)                  | 3354 (3376)                | 1713 (1728)                     | 1683 (1748)                    | 1312 (1318)                  | 1056 (1044)                  | 1206 (1190)           | 544 (558)         | 460 (481)             | 371 (430) |
|             |         | II                         | 3455 (3442)                   | 3391 (3436)                  | 3328 (3353)                | 1691 (1745)                     | 1657 (1726)                    | 1320 (1303)                  | 1041 (1029)                  | 1201 (1182)           | 535 (552)         | 452 (442)             | 337 (423) |
|             |         |                            |                               |                              |                            |                                 |                                |                              |                              |                       |                   |                       |           |
| AG          | Expt.   | A                          | 3430                          | 3230                         | 3110                       | 1687                            | 1603                           | 1454                         | 1130                         | 1230                  | -----             | -----                 | 149       |
|             | Theori. | I                          | 3468 (3480)                   | 3394 (3392)                  | 3323 (3310)                | 1712 (1751)                     | 1642 (1746)                    | 1361 (1327)                  | 1045 (1089)                  | 1281 (1213)           | -----             | -----                 | 281 (419) |
|             |         | II                         | 3450 (3463)                   | 3374 (3370)                  | 3308 (3295)                | 1677 (1729)                     | 1605 (1729)                    | 1372 (1356)                  | 1088 (1130)                  | 1209 (1210)           | -----             | -----                 | 233 (373) |
| Pt(Ura)(AG) | Expt.   | A                          | 3435                          | 3232                         | 3176                       | 1717                            | 1667                           | 1419                         | 1124                         | 1237                  | 546s              | 477w                  | 248       |
|             |         | B                          | 3429                          | 3237                         | 3116                       | 1718                            | 1664                           | 1419                         | 1123                         | 1237                  | 546s              | 475w                  | 245       |
|             | Theori. | I                          | 3480 (3461)                   | 3406 (3454)                  | 3338 (3369)                | 1711 (1722)                     | 1666 (1729)                    | 1316 (1306)                  | 1121 (1031)                  | 1218 (1242)           | 540 (541)         | 475 (470)             | 350 (423) |
|             |         | II                         | 3459 (3439)                   | 3379 (3425)                  | 3368 (3388)                | 1690 (1740)                     | 1642 (1705)                    | 1323 (1308)                  | 1027 (1092)                  | 1246 (1215)           | 533 (537)         | 471 (476)             | 319 (397) |
|             |         |                            |                               |                              |                            |                                 |                                |                              |                              |                       |                   |                       |           |
| GL          | Expt.   | A                          | 3443                          | 3236                         | 3067                       | 1691                            | 1626                           | 1440                         | 1102                         | 1229                  | -----             | -----                 | 186       |
|             | Theori. | I                          | 3463 (3476)                   | 3383 (3405)                  | 3333 (3322)                | 1716 (1756)                     | 1642 (1761)                    | 1322 (1361)                  | 1016 (1021)                  | 1249 (1249)           | -----             | -----                 | 320 (400) |
|             |         | II                         | 3446 (3456)                   | 3375 (3383)                  | 3319 (3308)                | 1694 (1734)                     | 1629 (1742)                    | 1362 (1363)                  | 1036 (1075)                  | 1259 (1239)           | -----             | -----                 | 267 (379) |
| Pt(Ura)(GL) | Expt.   | A                          | 3449                          | 3250                         | 3120                       | 1717                            | 1650                           | 1419                         | 1097                         | 1237                  | 545s              | 475w                  | 231       |
|             |         | B                          | 3434                          | 3242                         | 3121                       | 1717                            | 1645                           | 1418                         | 1093                         | 1236                  | 545s              | 473w                  | 227       |
|             | Theori. | I                          | 3475 (3460)                   | 3422 (3464)                  | 3354 (3381)                | 1713 (1728)                     | 1683 (1748)                    | 1329 (1333)                  | 1067 (1061)                  | 1197 (1221)           | 551 (552)         | 453 (447)             | 354 (415) |
|             |         | II                         | 3453 (3438)                   | 3388 (3436)                  | 3326 (3353)                | 1691 (1745)                     | 1656 (1726)                    | 1333 (1363)                  | 1021 (1013)                  | 1224 (1217)           | 546 (547)         | 446 (439)             | 323 (363) |
|             |         |                            |                               |                              |                            |                                 |                                |                              |                              |                       |                   |                       |           |
| Ura         | Expt.   | A                          | 3447                          | 3413                         | 1735                       | 1765                            | 3381-3395                      | -----                        | -----                        | 1602-1636             | -----             | 1725-1740             |           |
|             |         | B                          |                               |                              |                            |                                 | 3382-3385                      | -----                        | -----                        | 1602-1670             | -----             | 1728-1739             |           |
|             | Theori. | I                          | 3480 (3506)                   | 3458 (3466)                  | 1658 (1694)                | 1708 (1725)                     | 3471-3475 (3488-3490)          | -----                        | -----                        | 1716-1717 (1629-1630) | -----             | 1703-1705 (1755-1756) |           |
|             |         | II                         | 3459 (3483)                   | 3437 (3444)                  | 1681 (1753)                | 1732 (1747)                     | 3450-3455 (3466-3467)          | -----                        | -----                        | 1677-1678 (1731-1733) | -----             | 1719-1726 (1746-1751) |           |
|             |         |                            |                               |                              |                            |                                 |                                |                              |                              |                       |                   |                       |           |

A=Solid state; B= Solution phase products; I= at B3PW91; II= B3LYP; w=weak; s=strong. For theoretical data, the frequencies below  $1,800 \text{ cm}^{-1}$  are scaled with 0.977 and for those above  $1,800 \text{ cm}^{-1}$  a correction factor 0.955 is used

**Table S4.** Calculated bond lengths (in angstrom), bond angles and dihedral angles (in degrees) of the ligands and the metal complexes calculated at B3PW91 level in vacuum and aqueous environment.

| Bond Distance                                                  | GV              | Pt(Ura)(GV)                      | MD <sup>A</sup> | AG              | Pt(Ura)(AG)                      | MD <sup>B</sup> | GL              | Pt(Ura)(GL)                      | MD <sup>C</sup> |
|----------------------------------------------------------------|-----------------|----------------------------------|-----------------|-----------------|----------------------------------|-----------------|-----------------|----------------------------------|-----------------|
| C <sub>1</sub> -C <sub>2</sub>                                 | 1.568 (1.551)   | 1.557 (1.559)                    | 0.011 (0.008)   | 1.562 (1.547)   | 1.555 (1.557)                    | 0.007 (0.010)   | 1.561 (1.546)   | 1.555 (1.556)                    | 0.006 (0.010)   |
| C <sub>2</sub> -N <sub>3</sub>                                 | 1.463 (1.459)   | 1.473 (1.481)                    | 0.010 (0.022)   | 1.462 (1.456)   | 1.469 (1.479)                    | 0.007 (0.023)   | 1.463 (1.459)   | 1.472 (1.481)                    | 0.009 (0.008)   |
| N <sub>3</sub> -H                                              | 1.011 (1.010)   | 1.010 (1.010)                    | 0.001 (0.000)   | 1.011 (1.010)   | 1.011 (1.011)                    | 0.000 (0.001)   | 1.011 (1.010)   | 1.011 (1.011)                    | 0.000 (0.001)   |
| C <sub>4</sub> -N <sub>3</sub>                                 | 1.354 (1.368)   | 1.362 (1.374)                    | 0.008 (0.006)   | 1.356 (1.370)   | 1.364 (1.378)                    | 0.008 (0.008)   | 1.356 (1.370)   | 1.364 (1.375)                    | 0.008 (0.005)   |
| C <sub>4</sub> =O                                              | 1.229 (1.222)   | 1.229 (1.219)                    | 0.000 (0.003)   | 1.228 (1.221)   | 1.229 (1.219)                    | 0.001 (0.002)   | 1.229 (1.221)   | 1.229 (1.218)                    | 0.000 (0.003)   |
| C <sub>4</sub> -C <sub>5</sub>                                 | 1.527 (1.527)   | 1.524 (1.532)                    | 0.003 (0.005)   | 1.536 (1.534)   | 1.531 (1.538)                    | 0.005 (0.004)   | 1.527 (1.527)   | 1.523 (1.532)                    | 0.004 (0.005)   |
| C <sub>5</sub> -N <sub>6</sub>                                 | 1.502 (1.472)   | 1.494 (1.494)                    | 0.008 (0.022)   | 1.518 (1.479)   | 1.501 (1.501)                    | 0.017 (0.022)   | 1.503 (1.472)   | 1.493 (1.493)                    | 0.010 (0.021)   |
| C <sub>1</sub> -O <sub>7</sub>                                 | 1.282 (1.345)   | 1.315 (1.329)                    | 0.033 (0.016)   | 1.273 (1.337)   | 1.307 (1.318)                    | 0.034 (0.019)   | 1.281 (1.343)   | 1.316 (1.330)                    | 0.035 (0.013)   |
| C <sub>1</sub> -O <sub>8</sub>                                 | 1.242 (1.207)   | 1.224 (1.212)                    | 0.018 (0.005)   | 1.250 (1.212)   | 1.229 (1.218)                    | 0.021 (0.006)   | 1.244 (1.208)   | 1.224 (1.212)                    | 0.020 (0.004)   |
| Pt-O <sub>7</sub>                                              | -----           | 2.051 (2.022);<br>*0.390 (0.434) | -----           | -----           | 2.052 (2.024);<br>*0.375 (0.418) | -----           | -----           | 2.053 (2.021);<br>*0.385 (0.432) | -----           |
| Pt-O <sub>11</sub>                                             | -----           | 2.092 (2.106);<br>*0.371 (0.351) | -----           | -----           | 2.082 (2.099);<br>*0.382 (0.361) | -----           | -----           | 2.091 (2.105);<br>*0.375 (0.352) | -----           |
| Pt-N <sub>6</sub>                                              | -----           | 2.091 (2.099);<br>*0.414 (0.368) | -----           | -----           | 2.091 (2.099);<br>*0.410 (0.369) | -----           | -----           | 2.090 (2.100);<br>*0.416 (0.368) | -----           |
| Pt-N <sub>10</sub>                                             | -----           | 2.053 (2.028);<br>*0.413 (0.446) | -----           | -----           | 2.053 (2.029);<br>*0.415 (0.447) | -----           | -----           | 2.057 (2.028);<br>*0.411 (0.447) | -----           |
| Bond Angle                                                     |                 |                                  |                 |                 |                                  |                 |                 |                                  |                 |
| N <sub>3</sub> -C <sub>2</sub> -C <sub>1</sub>                 | 109.1 (110.7)   | 105.7 (105.7)                    | 3.4 (5.0)       | 109.9 (111.4)   | 106.6 (106.4)                    | 3.3 (5.0)       | 110.3 (112.1)   | 106.6 (106.4)                    | 3.7 (5.7)       |
| C <sub>4</sub> -C <sub>5</sub> -N <sub>6</sub>                 | 104.3 (105.6)   | 109.1 (110.7)                    | 4.8 (5.1)       | 104.1 (103.8)   | 107.1 (108.8)                    | 3.0 (5.0)       | 104.4 (105.1)   | 108.9 (110.6)                    | 4.5 (5.5)       |
| C <sub>2</sub> -C <sub>1</sub> -O <sub>7</sub>                 | 117.3 (117.1)   | 110.8 (109.8)                    | 6.5 (7.3)       | 117.8 (117.6)   | 111.5 (110.2)                    | 6.3 (7.4)       | 118.3 (117.9)   | 111.4 (110.1)                    | 6.9 (7.8)       |
| C <sub>2</sub> -N <sub>3</sub> -C <sub>4</sub>                 | 121.5 (123.1)   | 119.8 (118.8)                    | 1.7 (4.3)       | 120.7 (122.0)   | 119.0 (118.1)                    | 1.7 (3.9)       | 121.6 (123.2)   | 119.4 (118.6)                    | 2.2 (4.6)       |
| N <sub>3</sub> -C <sub>4</sub> -C <sub>5</sub>                 | 113.7 (113.4)   | 115.7 (115.8)                    | 2.0 (2.4)       | 115.2 (114.5)   | 116.7 (116.8)                    | 1.5 (2.3)       | 113.6 (113.2)   | 115.8 (115.8)                    | 2.2 (2.6)       |
| Dihedrals                                                      |                 |                                  |                 |                 |                                  |                 |                 |                                  |                 |
| C <sub>2</sub> -N <sub>3</sub> -C <sub>4</sub> -C <sub>5</sub> | 140.6 (151.8)   | 138.2 (135.8)                    | 2.4 (16)        | 141.1 (149.7)   | 139.6 (136.9)                    | 1.5 (12.8)      | 139.8 (150.8)   | 138.4 (135.6)                    | 1.4 (15.2)      |
| H-N <sub>3</sub> -C <sub>4</sub> -O                            | -179.0 (-177.7) | 180.0 (-177.1)                   | 1.0 (0.6)       | -178.8 (-175.0) | -178.3 (-175.4)                  | 0.5 (0.4)       | -178.4 (-176.1) | -179.2 (-176.3)                  | 0.8 (0.2)       |
| C <sub>1</sub> -C <sub>2</sub> -N <sub>3</sub> -C <sub>4</sub> | -56.5 (-61.6)   | -44.1 (-47.1)                    | 12.4 (14.5)     | -55.5 (-57.8)   | -43.8 (-45.8)                    | 11.7 (12)       | -61.0 (-64.7)   | -44.6 (-47.9)                    | 16.4 (16.8)     |
| N <sub>3</sub> -C <sub>4</sub> -C <sub>5</sub> -N <sub>6</sub> | -79.2 (-71.6)   | -66.9 (-64.8)                    | 12.3 (6.8)      | -69.5 (-71.0)   | -68.7 (-66.5)                    | 0.8 (4.5)       | -78.9 (-73.3)   | -68.3 (-65.2)                    | 10.6 (8.1)      |
| N <sub>3</sub> -C <sub>2</sub> -C <sub>1</sub> -O <sub>7</sub> | -18.7 (-22.6)   | -49.2 (-47.2)                    | 30.5 (24.6)     | -19.2 (-25.7)   | -47.2 (-46.4)                    | 28.0 (20.7)     | -9.9 (-17.3)    | -47.0 (-45.9)                    | 37.1 (28.6)     |
| N <sub>3</sub> -C <sub>2</sub> -C <sub>1</sub> -O <sub>8</sub> | 164.4 (161.7)   | 129.6 (129.6)                    | 34.8 (32.1)     | 163.7 (158.6)   | 132.7 (131.1)                    | 31.0 (27.5)     | 172.8 (166.9)   | 133.0 (131.8)                    | 39.8 (35.1)     |

MD<sup>A</sup>; MD<sup>B</sup> and MD<sup>C</sup> are the largest variations of Pt(Ura)(GV), Pt(Ura)(AG) and Pt(Ura)(GL) from their constituent dipeptide molecules; \*Wiberg bond indices. Values in parentheses are from gas phase calculations.

**Table S5.** DNA binding-affinities\* of the three ternary complexes of Pt(II)

| System          | Single point energies at UFF level (kcal/mol) | $E_{\text{Binding-affinity}}$ (kcal/mol) |
|-----------------|-----------------------------------------------|------------------------------------------|
| DNA             | -9082.96611048                                |                                          |
| Pt(Ura)(GV)     | -147.64418800                                 |                                          |
| Pt(Ura)(AG)     | -170.18546617                                 |                                          |
| Pt(Ura)(GL)     | -148.18122431                                 |                                          |
| DNA-Pt(Ura)(GV) | -9256.86445240                                | -26.25415392                             |
| DNA-Pt(Ura)(AG) | -9290.18251919                                | -37.03094254                             |
| DNA-Pt(Ura)(GL) | -9259.47825098                                | -28.33091619                             |

\*The theoretical DNA binding-affinity order of the three ternary complexes were determined by performing single point energy calculations at UFF level<sup>1</sup> inbuilt in ARGUSLAB 4.0.1 program<sup>2</sup> on the molecular geometries of the highest ranking docked poses of the Pt(Ura)GV, Pt(Ura)AG and Pt(Ura)GL with the classical d(CGCGAATTCGCG)<sub>2</sub> B-DNA sequence, aqueous phase optimized structures of the three metallic complexes (Gaussian 09 program) and the d(CGCGAATTCGCG)<sub>2</sub> B-DNA sequence generated by AVOGADRO 1.1.1 package. The DNA binding-affinities were calculated using the equation S1, mentioned below:

$$E_{\text{Binding-affinity}} = E_{\text{Docked pose}} - (E_{\text{DNA}} + E_{\text{Metal-complex}}) \dots\dots (S1)$$

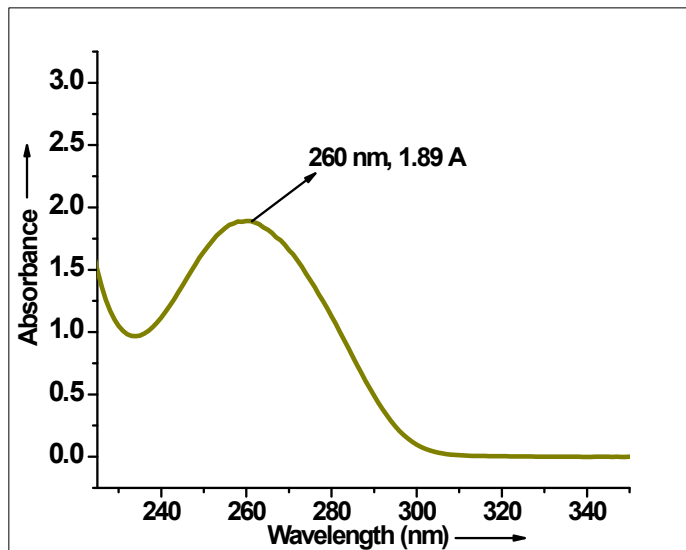

CT-DNA

Fig. S1 Experimental UV-vis spectrum of CT-DNA in aqueous phase

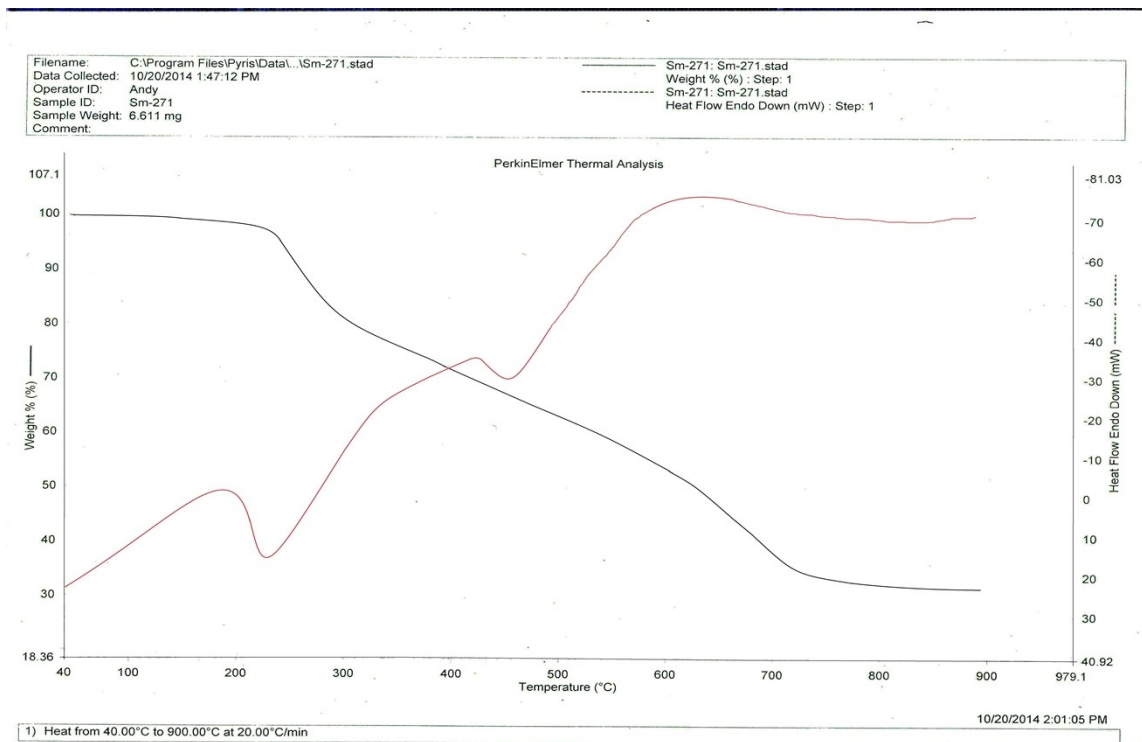

TG/DTA curve for Pt(Ura)(GV) (Solid state technique)

Fig. S2 TG/DTA curves of the metal complexes prepared in solid state



Filename: C:\Program Files\Pyris\Data\..\Sm-269.stad  
 Data Collected: 10/21/2014 12:56:33 PM  
 Operator ID: Andy  
 Sample ID: Sm-269  
 Sample Weight: 7.056 mg  
 Comment:

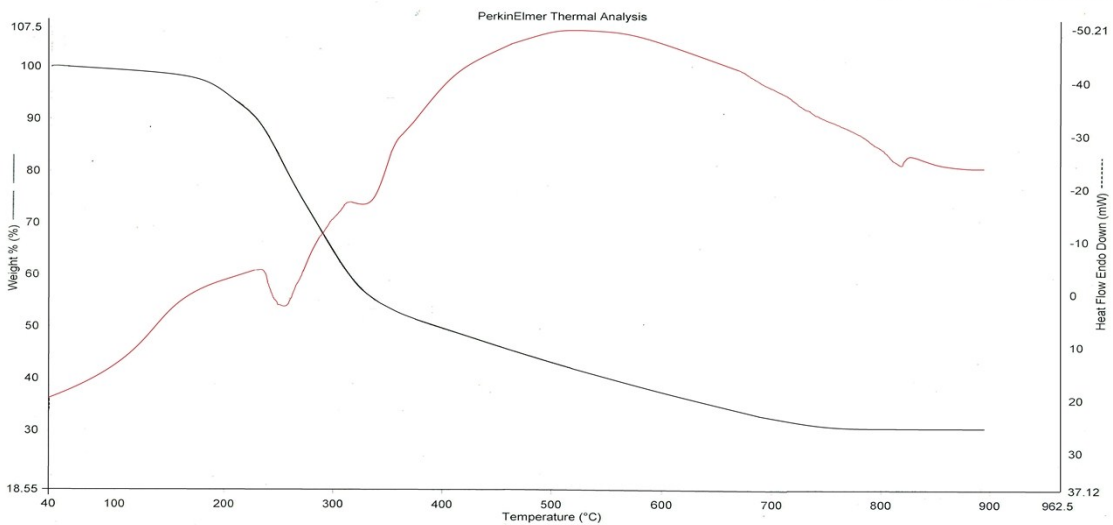

1) Heat from 40.00°C to 900.00°C at 20.00°C/min 10/21/2014 1:07:18 PM

TG/DTA curve for Pt(Ura)(AG) (Solid state technique)

Filename: C:\Program Files\Pyris\Data\..\Sm-285.stad  
 Data Collected: 10/21/2014 2:11:18 PM  
 Operator ID: Andy  
 Sample ID: Sm-285  
 Sample Weight: 5.813 mg  
 Comment:

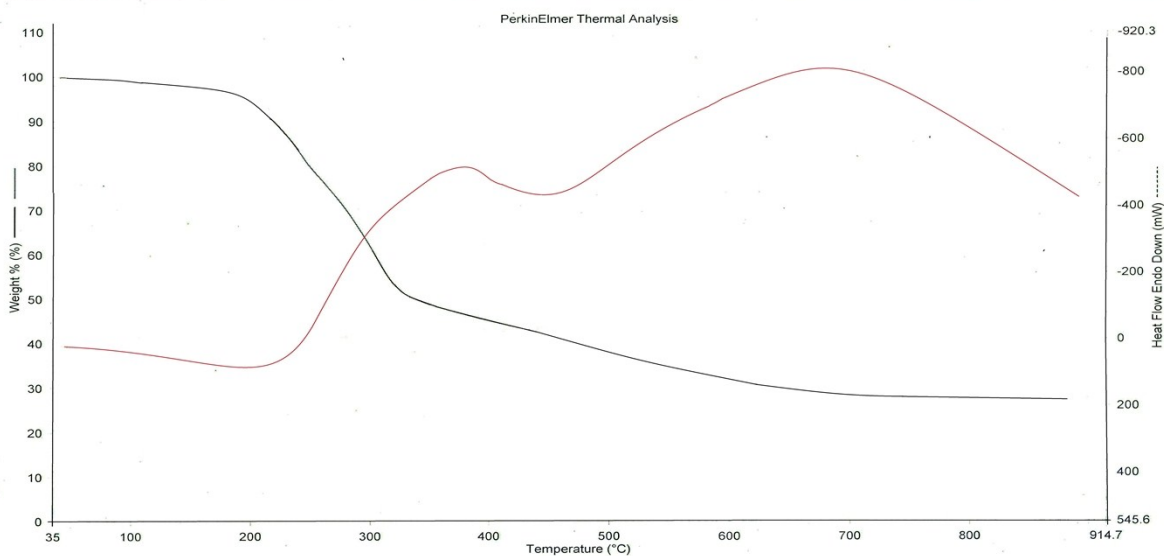

1) Heat from 40.00°C to 900.00°C at 20.00°C/min 10/21/2014 2:32:52 PM

TG/DTA curve for Pt(Ura)(GL) (Solid state technique)

Fig. S2 Continued...

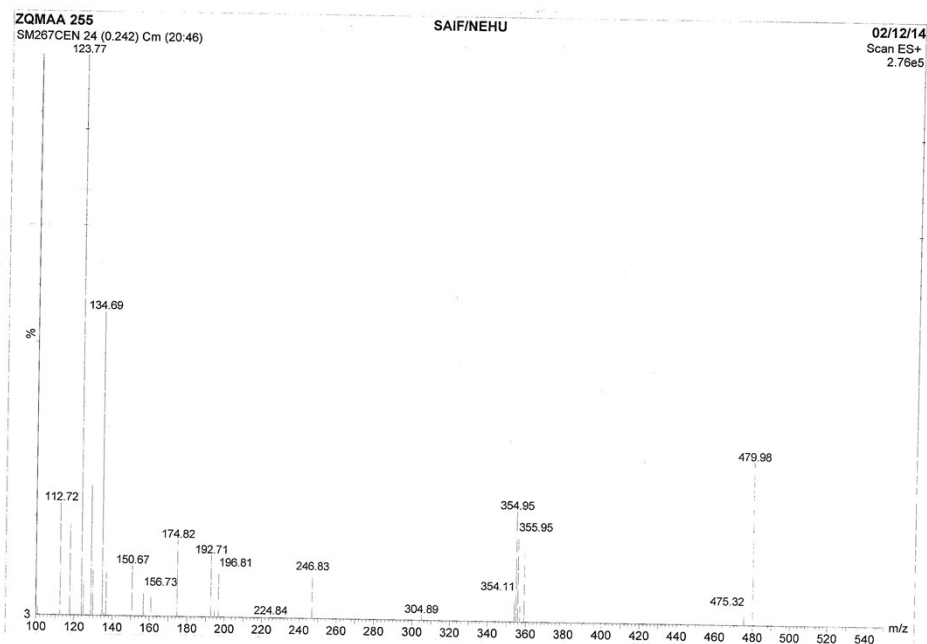

Mass spectrum of the complex Pt(Ura)(GV) in DMSO solution

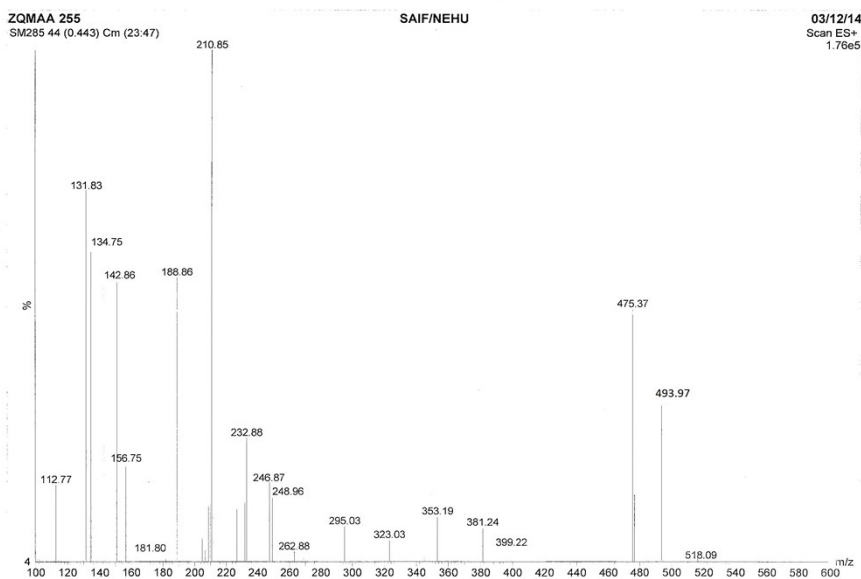

Mass spectrum of the complex Pt(Ura)(GL) in DMSO solution

Fig. S3 Mass spectrum of the metal complexes prepared by solid state technique

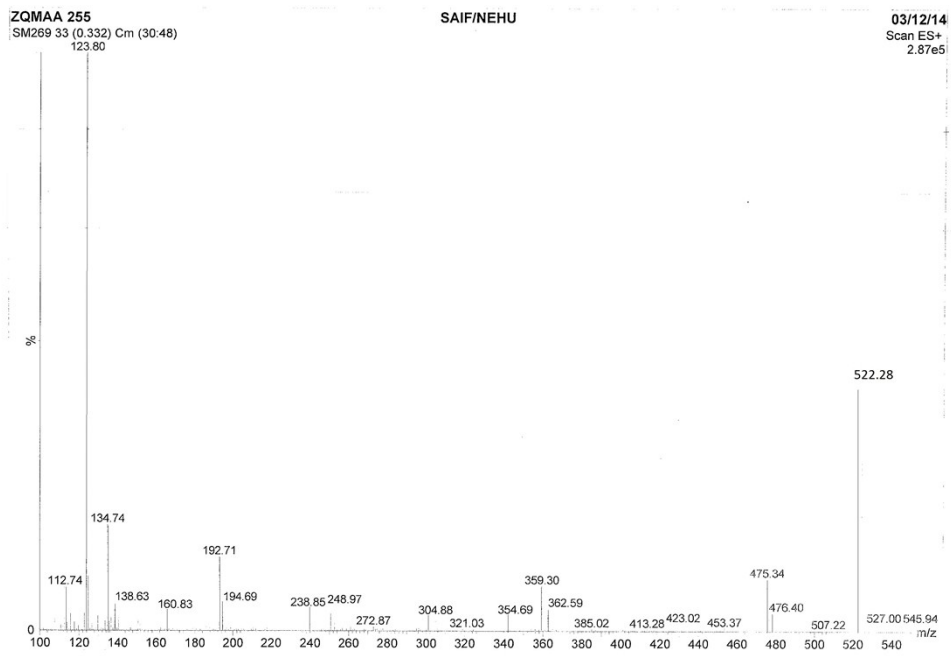

Mass spectrum of the complex Pt(Ura)(AG) in DMSO solution.

**Fig. S3** Continued.....

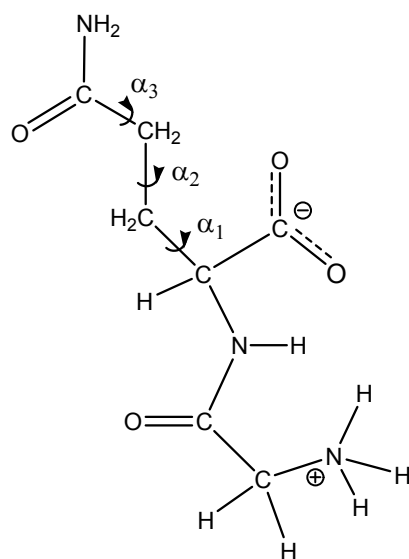

Zwitterion *L*-alanyl-*L*-glutamine

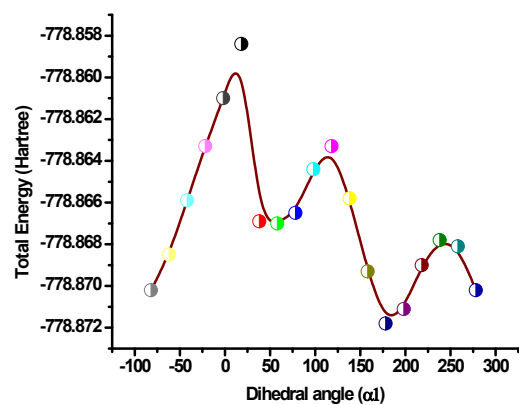

Rotation about  $\alpha_1$

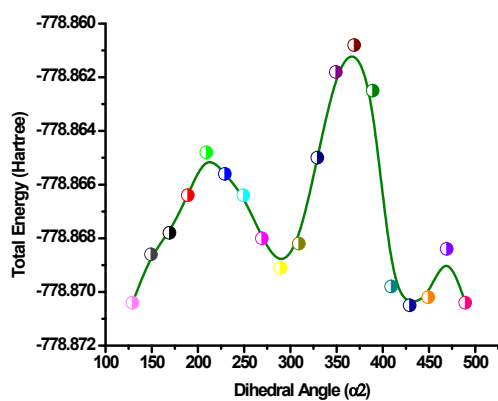

Rotation about  $\alpha_2$

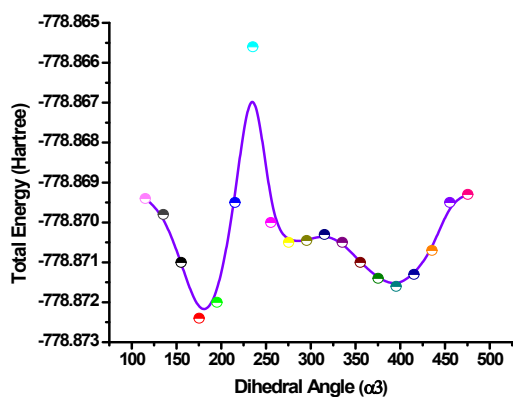

Rotation about  $\alpha_3$

**Fig. S4** The potential energy surfaces corresponding to the three dihedrals  $\alpha_1$ ,  $\alpha_2$  and  $\alpha_3$  of zwitterion *L*-alanyl-*L*-glutamine at B3PW91/6-31++G(d,p) level in the aqueous phase.

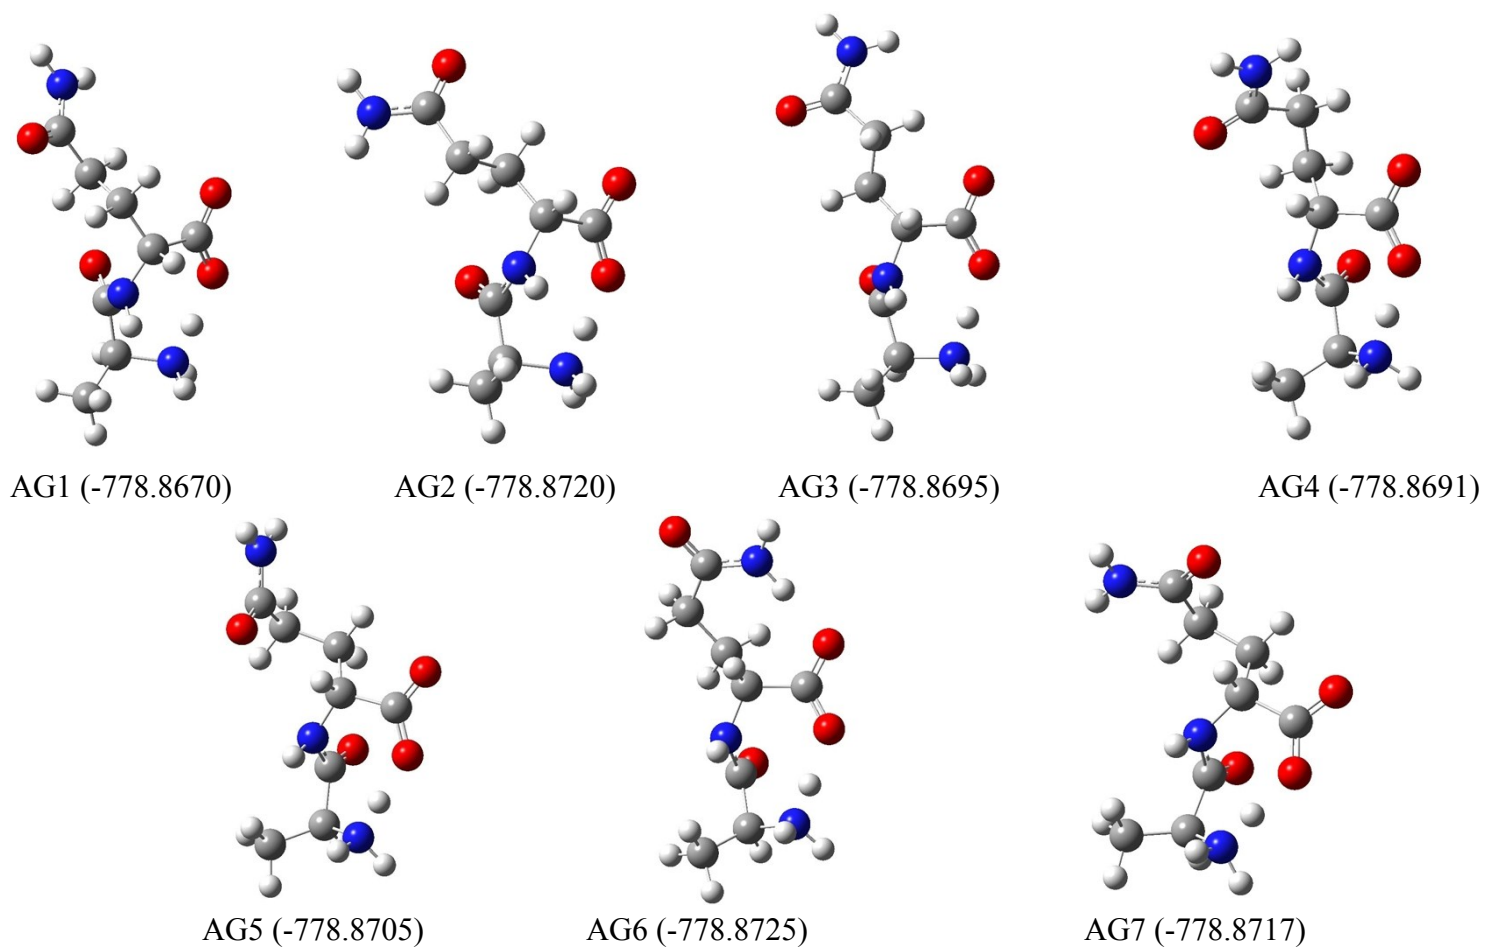

**Fig. S5** B3PW91/6-31++G(d,p) level optimized structures of the seven possible conformers of zwitterion *l*-alanyl-*l*-glutamine corresponding to the three dihedrals  $\alpha_1$ ,  $\alpha_2$  and  $\alpha_3$  in aqueous phase (energy in Hartree)

Date: Tuesday, May 13, 2014

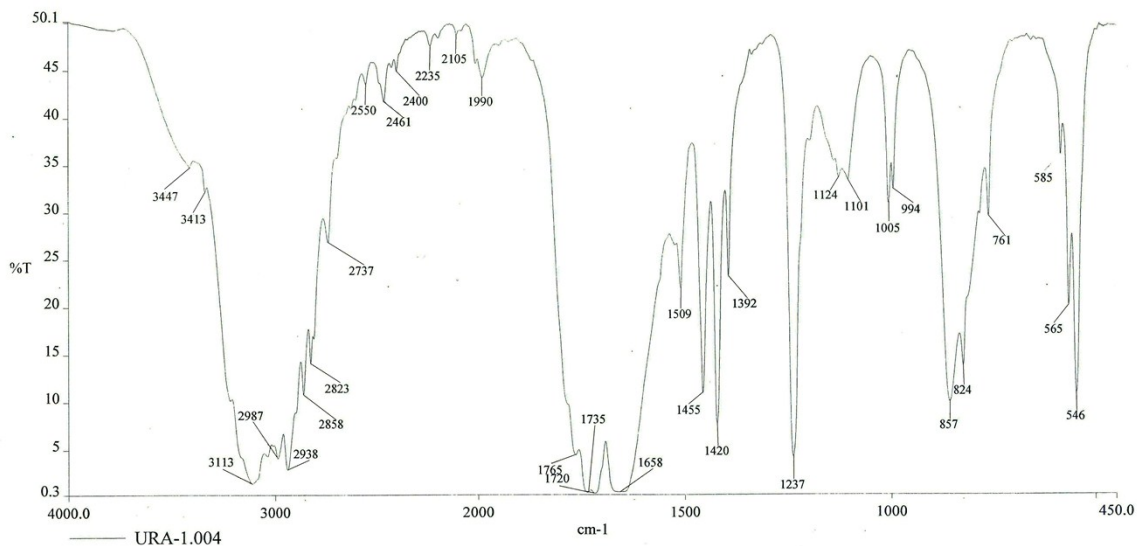

Experimental FT-IR spectra of Uracil

Date: Tuesday, May 13, 2014

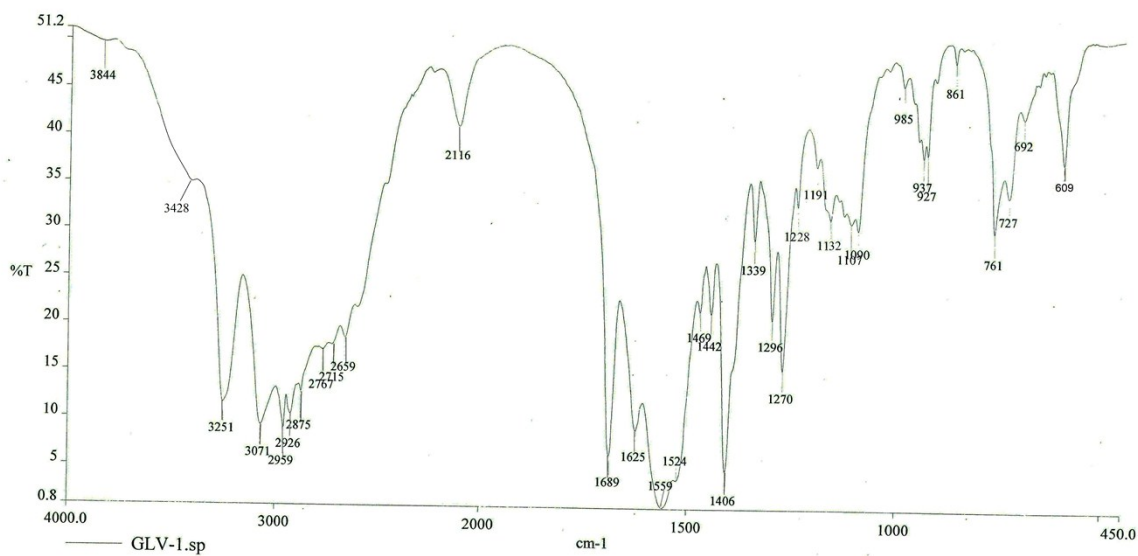

Experimental FT-IR spectra of GV

**Fig. S6** Experimental FT-IR spectra of the ligands and their ternary complexes with Pt(II)

Date: Wednesday, April 02, 2014

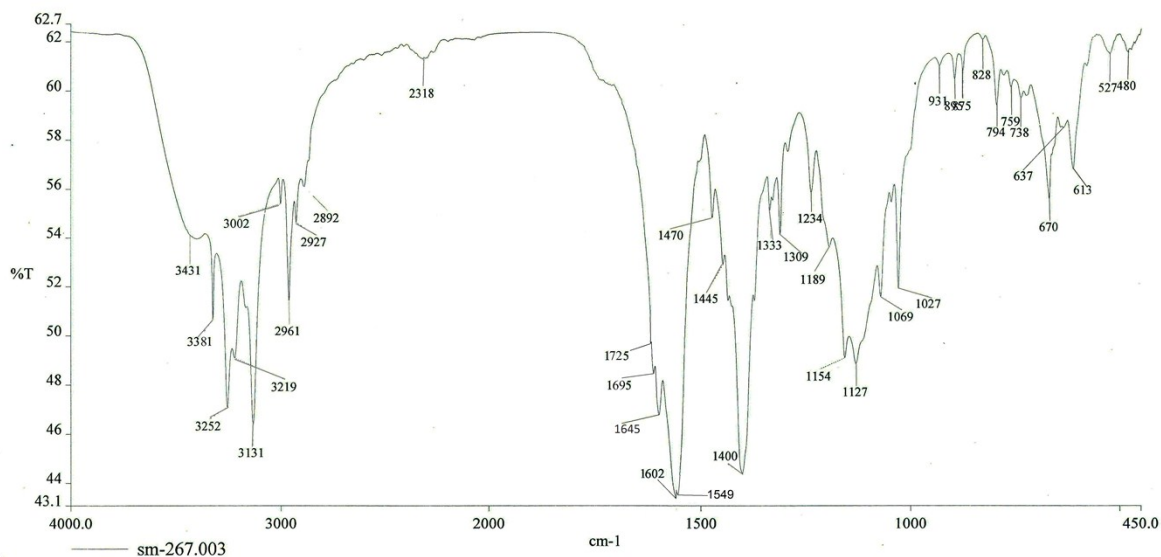

Experimental FT-IR spectra for Pt(Ura)(GV) complex (solid state technique)

Date: Wednesday, May 07, 2014

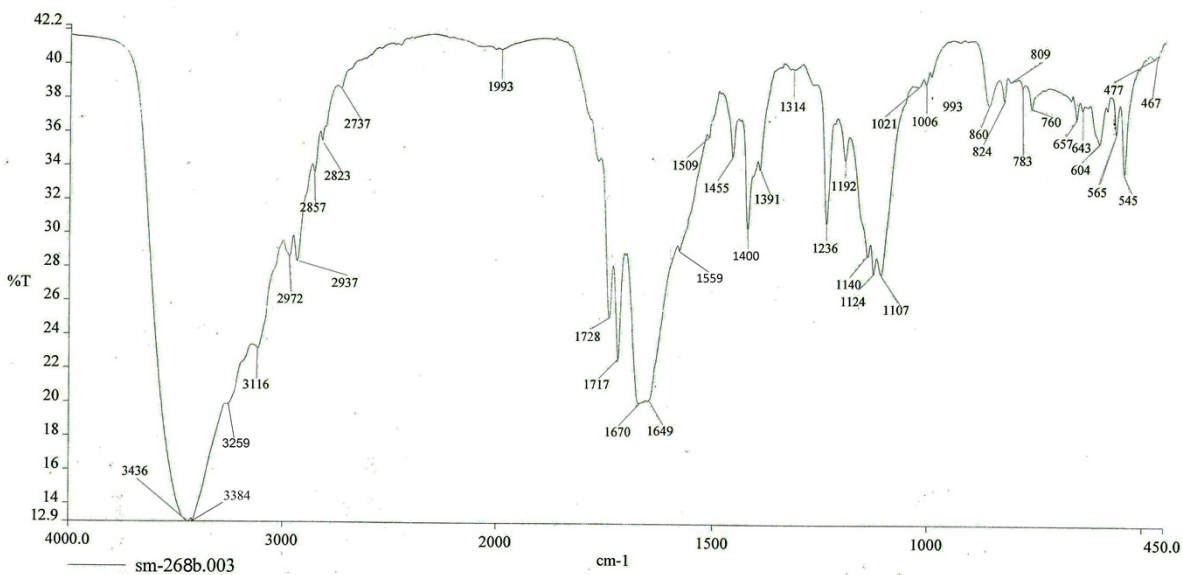

Experimental FT-IR spectra for Pt(Ura)(GV) complex (solution method)

Fig. S6 Continued....

Date: Sunday, January 01, 2006

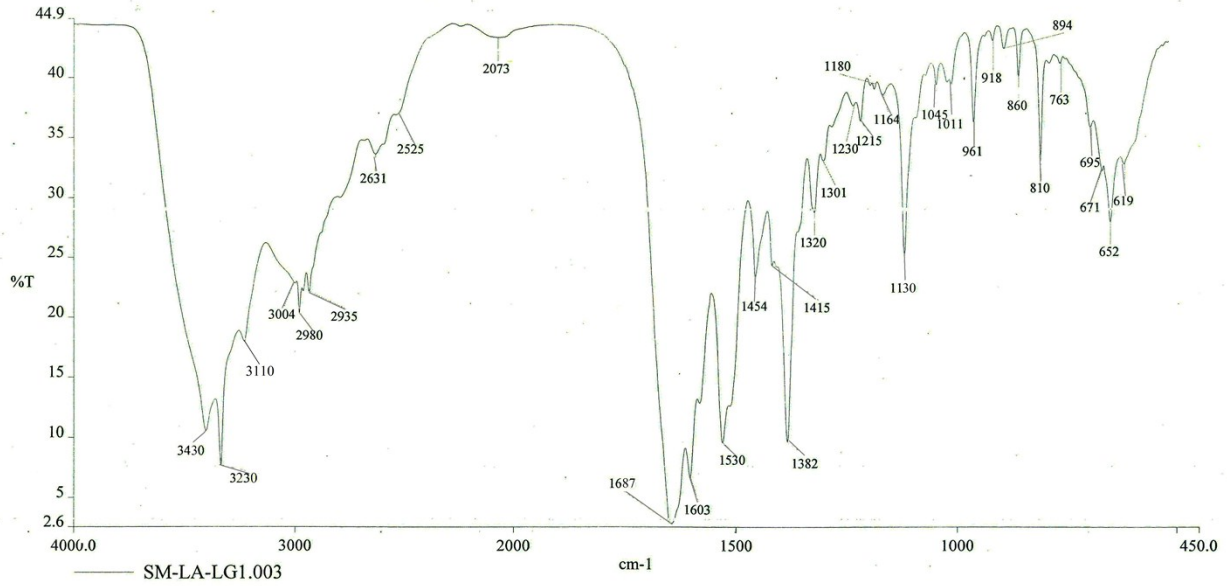

Experimental FT-IR spectra for AG

Date: Tuesday, June 10, 2014

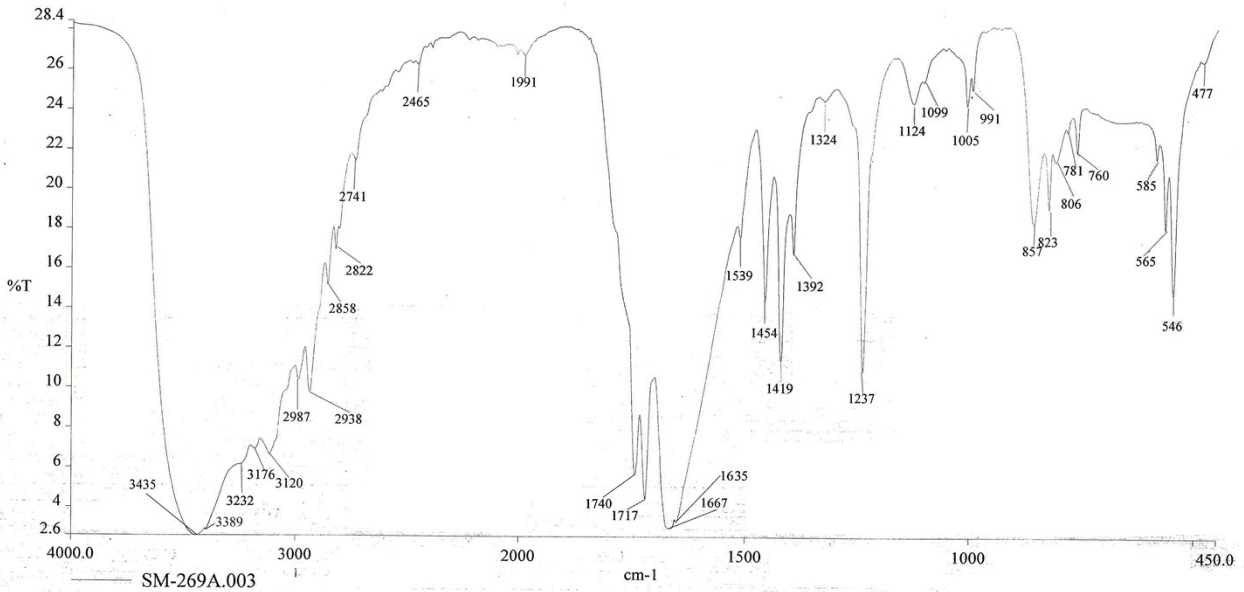

Experimental FT-IR spectra for Pt(Ura)(AG) complex (solid state technique)

Fig. S6 Continued....



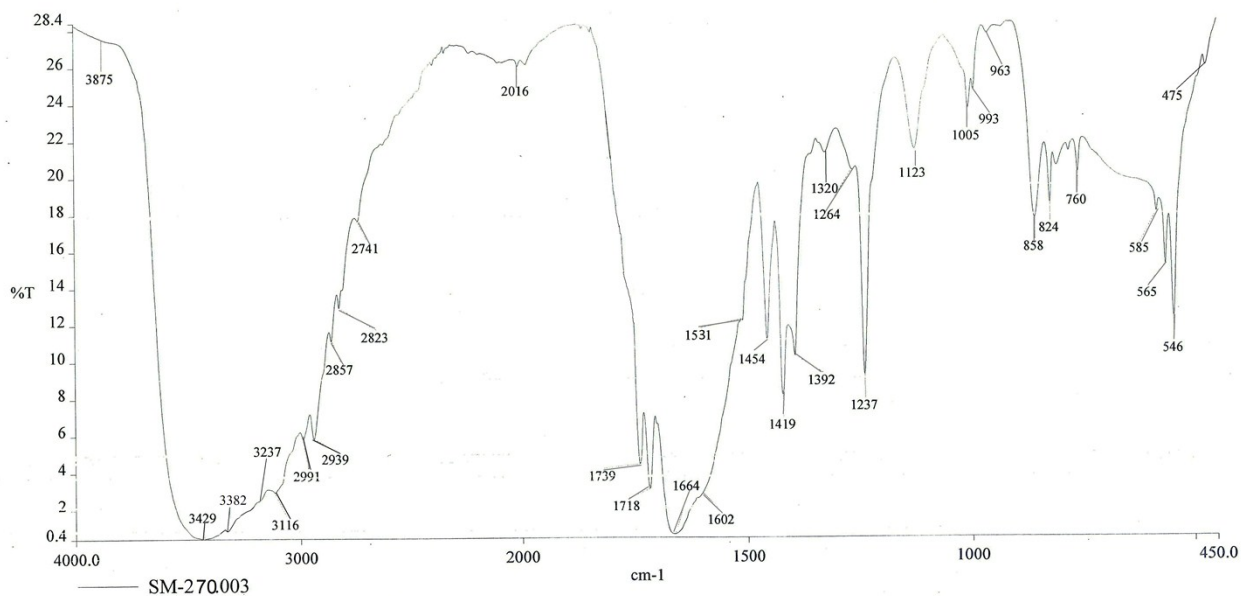

Experimental FT-IR spectra for Pt(Ura)(AG) complex (solution method)

Date: Thursday, October 16, 2014

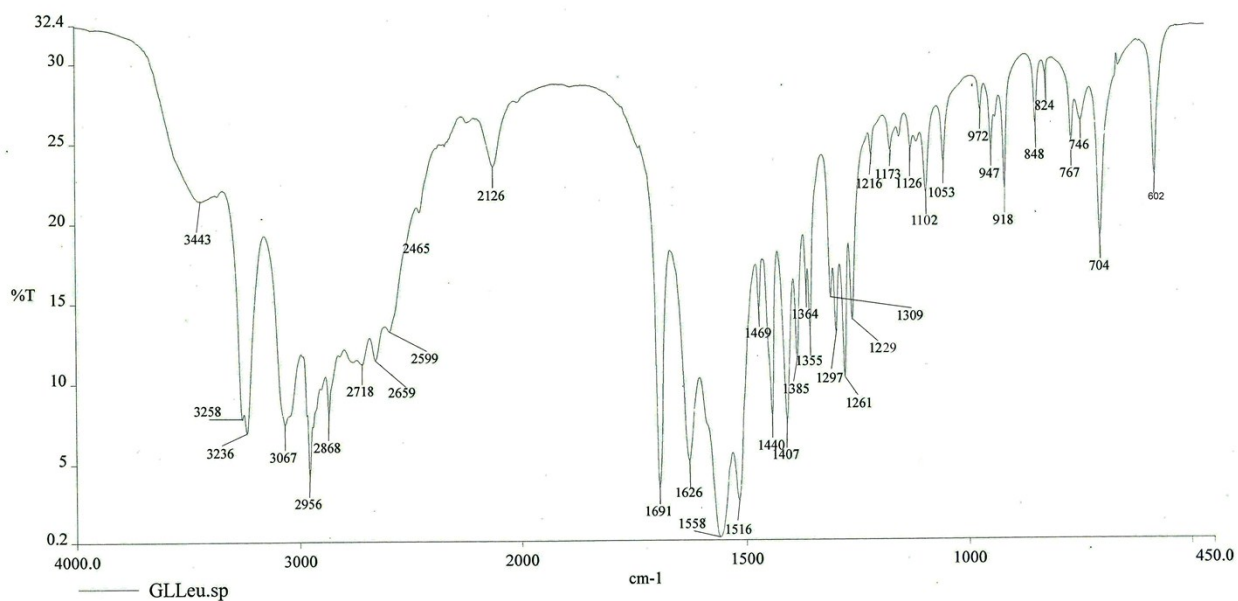

Experimental FT-IR spectra for GL

Fig. S6 Continued....

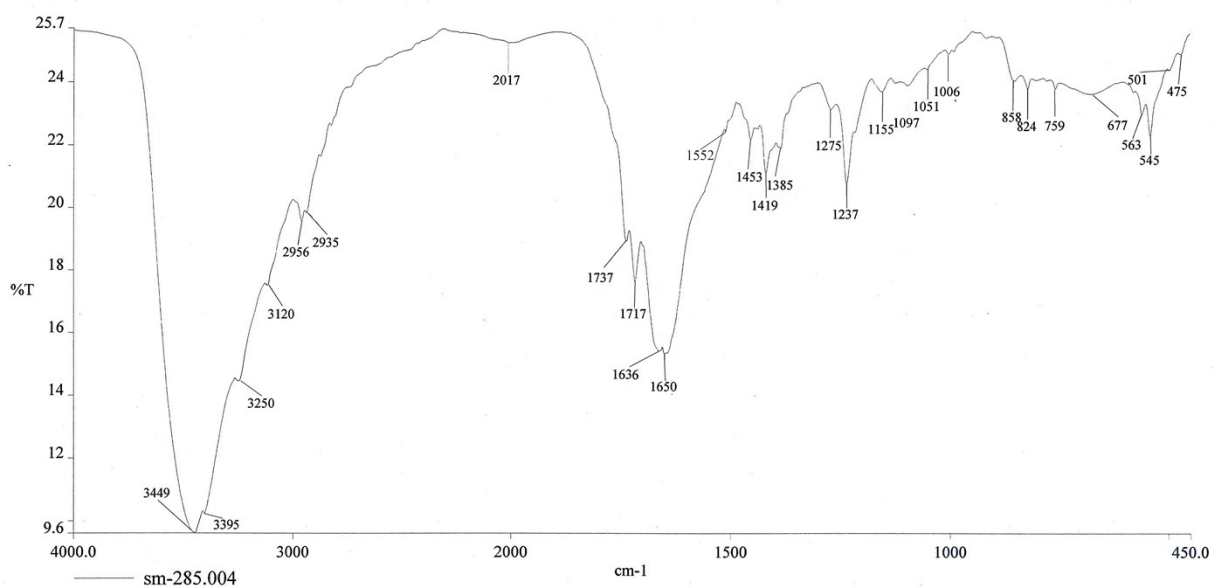

Experimental FT-IR spectra for Pt(Ura)(GL) complex (solid state technique)

Date: Thursday, October 16, 2014

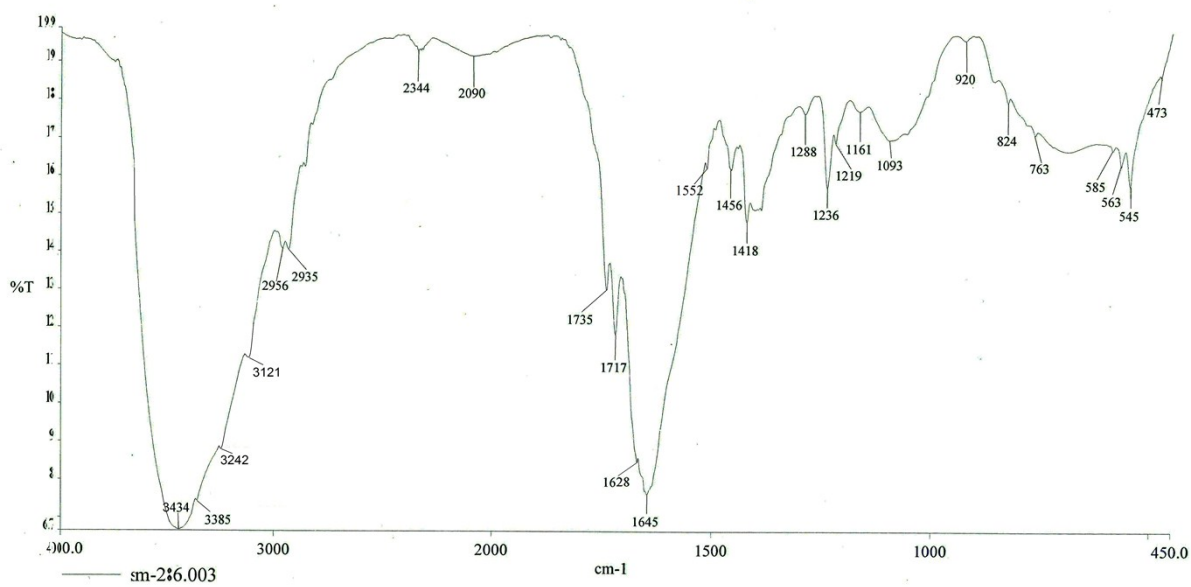

Experimental FT-IR spectra for Pt(Ura)(GL) complex (solution method)

Fig. S6 Continued....

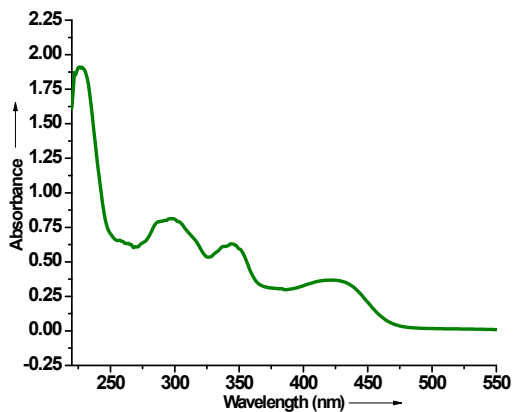

Pt(Ura)(GV) (solid state technique)

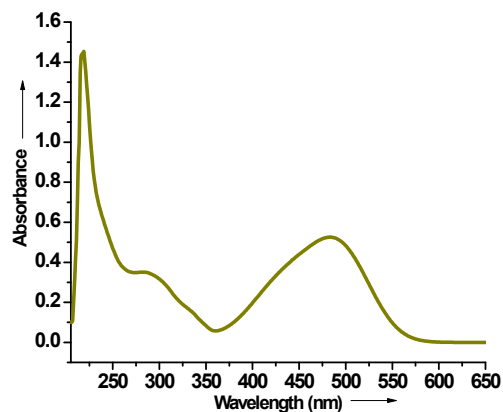

Pt(Ura)(GV) (solution method)

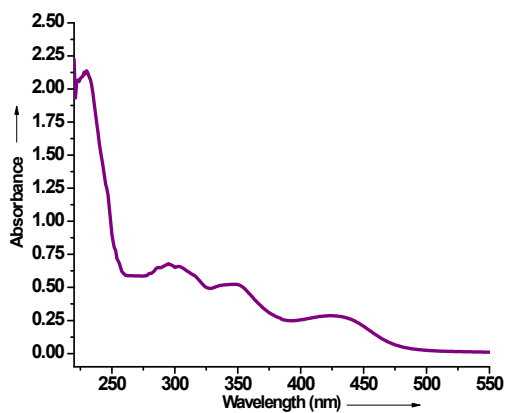

Pt(Ura)(AG) (solid state technique)

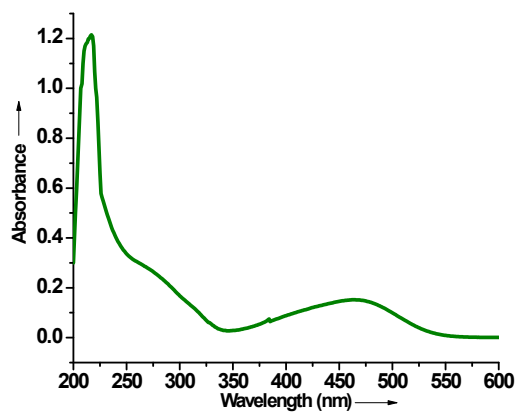

Pt(Ura)(AG) (solution method)

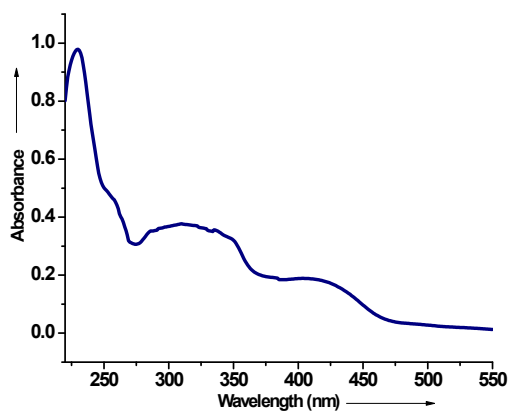

Pt(Ura)(GL) (solid state technique)

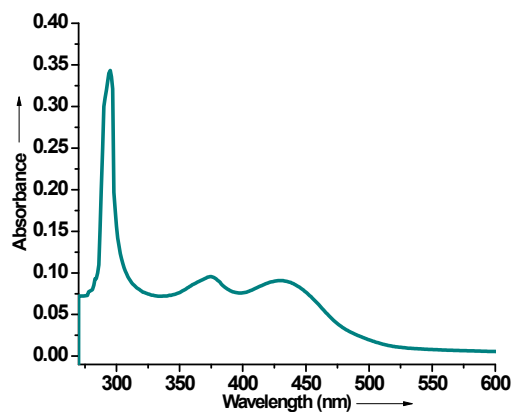

Pt(Ura)(GL) (solution method)

**Fig. S7** Experimental UV-vis spectra of the synthesized complexes in deionized water.

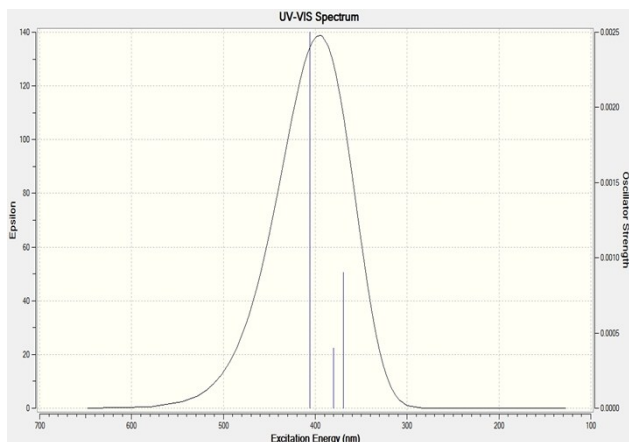

UV-vis spectra of Pt(Ura)(GV) in aqueous phase

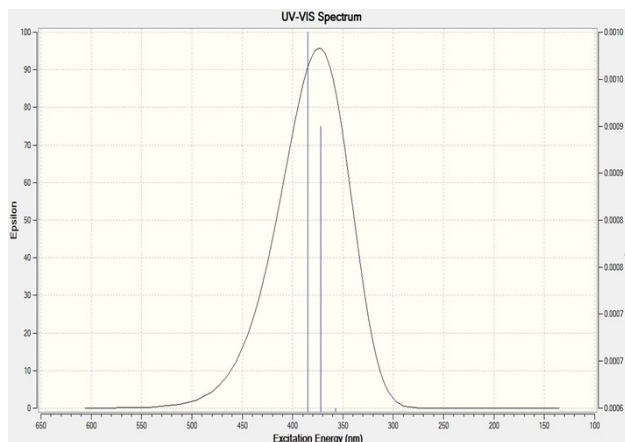

UV-vis spectra of Pt(Ura)(GV) in gas phase

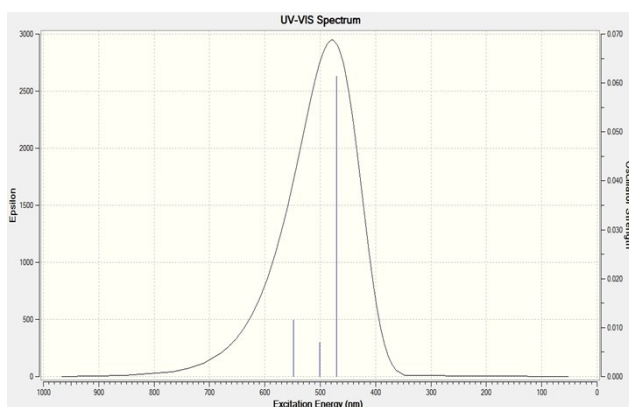

UV-vis spectra for Pt(Ura)(AG) in aqueous phase

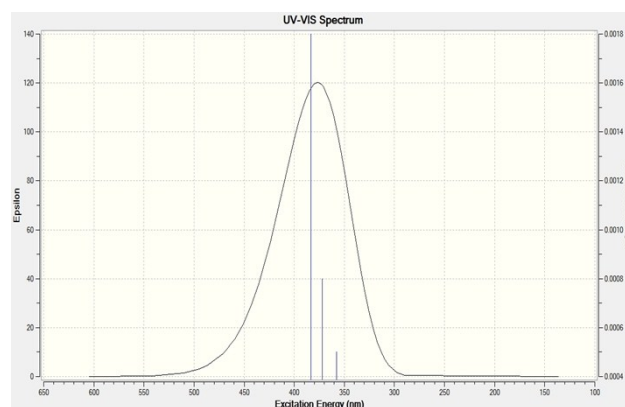

UV-vis spectra for Pt(Ura)(AG) in gas phase

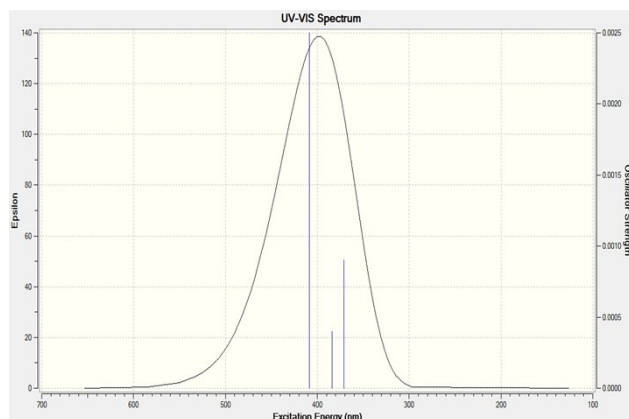

UV-vis spectra for Pt(Ura)(GL) in aqueous phase

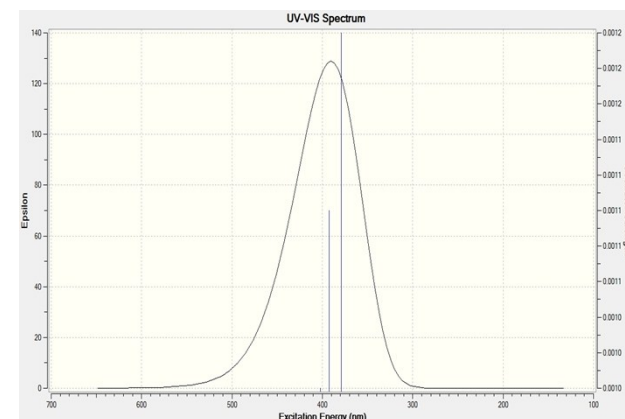

UV-vis spectra for Pt(Ura)(GL) in gas phase

**Fig. S8** Theoretical UV-vis spectra of the complexes in gas and aqueous phases

► Cartesian coordinates of the optimized structures of the ligands their metal complexes in gas and aqueous phases using the B3PW91 level of theory

Uracil- gas phase

|    |   |   |           |           |           |
|----|---|---|-----------|-----------|-----------|
| 1  | 7 | 0 | 1.174268  | 0.983918  | 0.000004  |
| 2  | 6 | 0 | 1.216779  | -0.404842 | 0.000025  |
| 3  | 7 | 0 | -0.034940 | -0.985084 | 0.000005  |
| 4  | 6 | 0 | -1.288273 | -0.345363 | 0.000016  |
| 5  | 6 | 0 | -1.201736 | 1.108262  | 0.000015  |
| 6  | 6 | 0 | 0.008782  | 1.707049  | 0.000007  |
| 7  | 1 | 0 | 0.129318  | 2.785200  | -0.000006 |
| 8  | 1 | 0 | -2.121369 | 1.677028  | 0.000009  |
| 9  | 8 | 0 | -2.314807 | -1.005361 | -0.000011 |
| 10 | 1 | 0 | -0.047714 | -1.998131 | -0.000020 |
| 11 | 8 | 0 | 2.261799  | -1.030361 | -0.000040 |
| 12 | 1 | 0 | 2.075225  | 1.439209  | -0.000016 |

Uracil- aqueous phase

|    |   |   |           |           |           |
|----|---|---|-----------|-----------|-----------|
| 1  | 7 | 0 | 1.176489  | 0.979917  | 0.000017  |
| 2  | 6 | 0 | 1.209982  | -0.399286 | 0.000016  |
| 3  | 7 | 0 | -0.038803 | -0.981720 | 0.000030  |
| 4  | 6 | 0 | -1.281832 | -0.336865 | 0.000137  |
| 5  | 6 | 0 | -1.197750 | 1.107613  | 0.000026  |
| 6  | 6 | 0 | 0.017002  | 1.705428  | 0.000016  |
| 7  | 1 | 0 | 0.142207  | 2.781842  | -0.000032 |
| 8  | 1 | 0 | -2.111471 | 1.685934  | -0.000038 |
| 9  | 8 | 0 | -2.316214 | -1.004017 | -0.000087 |
| 10 | 1 | 0 | -0.051474 | -1.995459 | -0.000040 |
| 11 | 8 | 0 | 2.253599  | -1.042004 | -0.000083 |
| 12 | 1 | 0 | 2.073455  | 1.447131  | -0.000023 |

Gly-Val- aqueous phase

|    |   |   |           |           |           |
|----|---|---|-----------|-----------|-----------|
| 1  | 8 | 0 | -0.945449 | 1.846987  | -0.122710 |
| 2  | 6 | 0 | 0.293803  | 1.549203  | 0.017787  |
| 3  | 8 | 0 | 1.144769  | 2.296656  | 0.528083  |
| 4  | 6 | 0 | 0.774154  | 0.175233  | -0.565321 |
| 5  | 1 | 0 | 1.132664  | 0.401711  | -1.578090 |
| 6  | 7 | 0 | -3.105192 | 0.423022  | -0.206282 |
| 7  | 6 | 0 | -2.701011 | -1.023542 | -0.167420 |
| 8  | 1 | 0 | -2.854429 | -1.455553 | -1.157125 |
| 9  | 1 | 0 | -3.303623 | -1.559531 | 0.563403  |
| 10 | 6 | 0 | -1.231379 | -0.993602 | 0.244873  |
| 11 | 8 | 0 | -0.898076 | -1.084314 | 1.424802  |
| 12 | 7 | 0 | -0.387592 | -0.690796 | -0.769426 |
| 13 | 1 | 0 | -0.802468 | -0.634435 | -1.689319 |
| 14 | 1 | 0 | -3.724920 | 0.624965  | -0.990112 |
| 15 | 1 | 0 | -3.601186 | 0.687355  | 0.644733  |
| 16 | 6 | 0 | 1.949054  | -0.490070 | 0.193656  |
| 17 | 1 | 0 | 1.758660  | -0.383375 | 1.267792  |
| 18 | 6 | 0 | 2.058281  | -1.982534 | -0.130890 |

|    |   |   |           |           |           |
|----|---|---|-----------|-----------|-----------|
| 19 | 6 | 0 | 3.273633  | 0.205714  | -0.140144 |
| 20 | 1 | 0 | 1.168854  | -2.537597 | 0.177762  |
| 21 | 1 | 0 | 2.202612  | -2.142808 | -1.206662 |
| 22 | 1 | 0 | 2.922808  | -2.412063 | 0.387316  |
| 23 | 1 | 0 | 3.224610  | 1.274149  | 0.076459  |
| 24 | 1 | 0 | 4.089956  | -0.234152 | 0.443703  |
| 25 | 1 | 0 | 3.519226  | 0.075932  | -1.202545 |
| 26 | 1 | 0 | -2.192442 | 1.052779  | -0.263996 |

Gly-Val- gas phase

|    |   |   |           |           |           |
|----|---|---|-----------|-----------|-----------|
| 1  | 8 | 0 | -0.712487 | 2.095465  | -0.129427 |
| 2  | 6 | 0 | 0.514791  | 1.570918  | 0.033947  |
| 3  | 8 | 0 | 1.386603  | 2.220293  | 0.557844  |
| 4  | 6 | 0 | 0.767130  | 0.162590  | -0.563745 |
| 5  | 1 | 0 | 1.125568  | 0.354282  | -1.585488 |
| 6  | 7 | 0 | -3.226462 | 0.391891  | -0.344421 |
| 7  | 6 | 0 | -2.783632 | -0.987596 | -0.086161 |
| 8  | 1 | 0 | -2.899065 | -1.573174 | -1.004976 |
| 9  | 1 | 0 | -3.324769 | -1.494496 | 0.719706  |
| 10 | 6 | 0 | -1.313685 | -0.879894 | 0.311699  |
| 11 | 8 | 0 | -0.940114 | -0.944660 | 1.473015  |
| 12 | 7 | 0 | -0.489330 | -0.559557 | -0.732337 |
| 13 | 1 | 0 | -0.921493 | -0.502657 | -1.643212 |
| 14 | 1 | 0 | -4.048445 | 0.417346  | -0.938510 |
| 15 | 1 | 0 | -3.472929 | 0.852193  | 0.527638  |
| 16 | 6 | 0 | 1.884634  | -0.623197 | 0.169602  |
| 17 | 1 | 0 | 1.716721  | -0.508845 | 1.245512  |
| 18 | 6 | 0 | 1.832047  | -2.113290 | -0.174064 |
| 19 | 6 | 0 | 3.264000  | -0.053582 | -0.181688 |
| 20 | 1 | 0 | 0.906816  | -2.582849 | 0.167633  |
| 21 | 1 | 0 | 1.925512  | -2.278910 | -1.255010 |
| 22 | 1 | 0 | 2.666996  | -2.629977 | 0.310560  |
| 23 | 1 | 0 | 3.337705  | 1.006811  | 0.063813  |
| 24 | 1 | 0 | 4.040905  | -0.590013 | 0.373334  |
| 25 | 1 | 0 | 3.477088  | -0.183164 | -1.251637 |
| 26 | 1 | 0 | -1.383782 | 1.462636  | -0.461046 |

Gly-Leu- aqueous phase

|    |   |   |           |           |           |
|----|---|---|-----------|-----------|-----------|
| 1  | 8 | 0 | 1.487840  | 1.768224  | 0.013508  |
| 2  | 6 | 0 | 0.228251  | 1.538315  | -0.021450 |
| 3  | 8 | 0 | -0.632684 | 2.346836  | -0.410509 |
| 4  | 6 | 0 | -0.288451 | 0.168653  | 0.520916  |
| 5  | 1 | 0 | -0.698501 | 0.394190  | 1.511734  |
| 6  | 7 | 0 | 3.588940  | 0.258740  | 0.171556  |
| 7  | 6 | 0 | 3.139432  | -1.174446 | 0.210630  |
| 8  | 1 | 0 | 3.273577  | -1.555420 | 1.223796  |
| 9  | 1 | 0 | 3.729033  | -1.768254 | -0.485165 |
| 10 | 6 | 0 | 1.673130  | -1.124778 | -0.213986 |
| 11 | 8 | 0 | 1.345975  | -1.284411 | -1.387399 |
| 12 | 7 | 0 | 0.834647  | -0.733080 | 0.777765  |
| 13 | 1 | 0 | 1.258465  | -0.621140 | 1.689289  |
| 14 | 1 | 0 | 4.211313  | 0.483724  | 0.947022  |
| 15 | 1 | 0 | 4.098827  | 0.456783  | -0.689146 |

|    |   |   |           |           |           |
|----|---|---|-----------|-----------|-----------|
| 16 | 6 | 0 | -1.405256 | -0.461834 | -0.332885 |
| 17 | 1 | 0 | -1.226405 | -0.229090 | -1.386847 |
| 18 | 1 | 0 | -1.328968 | -1.552134 | -0.236714 |
| 19 | 6 | 0 | -2.831449 | -0.034192 | 0.052964  |
| 20 | 1 | 0 | -2.842498 | 1.061099  | 0.120668  |
| 21 | 6 | 0 | -3.815591 | -0.453128 | -1.042862 |
| 22 | 6 | 0 | -3.264641 | -0.612621 | 1.403803  |
| 23 | 1 | 0 | -4.839290 | -0.153823 | -0.791265 |
| 24 | 1 | 0 | -3.558484 | 0.002414  | -2.005794 |
| 25 | 1 | 0 | -3.811308 | -1.542718 | -1.176672 |
| 26 | 1 | 0 | -3.290130 | -1.709269 | 1.365780  |
| 27 | 1 | 0 | -2.592840 | -0.324898 | 2.220193  |
| 28 | 1 | 0 | -4.268340 | -0.264666 | 1.672247  |
| 29 | 1 | 0 | 2.698849  | 0.922575  | 0.188047  |

Gly-Leu- gas phase

|    |   |   |           |           |           |
|----|---|---|-----------|-----------|-----------|
| 1  | 8 | 0 | 1.331278  | 2.009238  | -0.002235 |
| 2  | 6 | 0 | 0.065685  | 1.571113  | -0.100843 |
| 3  | 8 | 0 | -0.789995 | 2.271446  | -0.586793 |
| 4  | 6 | 0 | -0.272800 | 0.192987  | 0.512872  |
| 5  | 1 | 0 | -0.667357 | 0.430920  | 1.508756  |
| 6  | 7 | 0 | 3.718050  | 0.147873  | 0.307916  |
| 7  | 6 | 0 | 3.193430  | -1.223252 | 0.194681  |
| 8  | 1 | 0 | 3.259655  | -1.709292 | 1.174265  |
| 9  | 1 | 0 | 3.712443  | -1.847443 | -0.540144 |
| 10 | 6 | 0 | 1.740042  | -1.059408 | -0.242836 |
| 11 | 8 | 0 | 1.389061  | -1.187417 | -1.405380 |
| 12 | 7 | 0 | 0.922196  | -0.606517 | 0.758767  |
| 13 | 1 | 0 | 1.355521  | -0.489264 | 1.663882  |
| 14 | 1 | 0 | 4.530004  | 0.191233  | 0.914727  |
| 15 | 1 | 0 | 4.007250  | 0.490073  | -0.604435 |
| 16 | 6 | 0 | -1.367740 | -0.551593 | -0.273055 |
| 17 | 1 | 0 | -1.170858 | -0.440506 | -1.342274 |
| 18 | 1 | 0 | -1.260751 | -1.619634 | -0.045172 |
| 19 | 6 | 0 | -2.807476 | -0.112419 | 0.044911  |
| 20 | 1 | 0 | -2.854645 | 0.978439  | -0.056149 |
| 21 | 6 | 0 | -3.765620 | -0.724376 | -0.980801 |
| 22 | 6 | 0 | -3.235458 | -0.495843 | 1.464852  |
| 23 | 1 | 0 | -4.799529 | -0.419255 | -0.785368 |
| 24 | 1 | 0 | -3.510201 | -0.410953 | -1.998514 |
| 25 | 1 | 0 | -3.731035 | -1.821103 | -0.948563 |
| 26 | 1 | 0 | -3.209494 | -1.584688 | 1.601630  |
| 27 | 1 | 0 | -2.598923 | -0.048154 | 2.237308  |
| 28 | 1 | 0 | -4.258727 | -0.160346 | 1.665404  |
| 29 | 1 | 0 | 1.971806  | 1.341093  | 0.324441  |

Ala-Gln- aqueous phase

|   |   |   |           |           |           |
|---|---|---|-----------|-----------|-----------|
| 1 | 8 | 0 | -1.047882 | 1.967115  | -0.239945 |
| 2 | 6 | 0 | 0.088838  | 1.399086  | -0.314636 |
| 3 | 8 | 0 | 1.181496  | 1.959126  | -0.081298 |
| 4 | 6 | 0 | 0.131899  | -0.084872 | -0.799420 |
| 5 | 1 | 0 | 0.299257  | -0.033504 | -1.881834 |
| 6 | 7 | 0 | -3.464945 | 0.998006  | 0.081234  |
| 7 | 6 | 0 | -3.335862 | -0.457297 | 0.492509  |

|    |   |   |           |           |           |
|----|---|---|-----------|-----------|-----------|
| 8  | 1 | 0 | -3.698630 | -0.537872 | 1.517141  |
| 9  | 6 | 0 | -1.819877 | -0.698420 | 0.548467  |
| 10 | 8 | 0 | -1.236930 | -0.751568 | 1.628240  |
| 11 | 7 | 0 | -1.189031 | -0.693781 | -0.652166 |
| 12 | 1 | 0 | -1.774971 | -0.628881 | -1.473160 |
| 13 | 1 | 0 | -4.042823 | 1.106361  | -0.753558 |
| 14 | 1 | 0 | -3.903683 | 1.551063  | 0.817759  |
| 15 | 6 | 0 | 1.265760  | -0.921009 | -0.183063 |
| 16 | 1 | 0 | 1.339182  | -0.693320 | 0.883226  |
| 17 | 6 | 0 | -4.139586 | -1.370614 | -0.419078 |
| 18 | 1 | 0 | -4.011850 | -2.407009 | -0.097305 |
| 19 | 1 | 0 | -5.203021 | -1.124605 | -0.353789 |
| 20 | 1 | 0 | -3.837390 | -1.300158 | -1.468553 |
| 21 | 1 | 0 | 0.973136  | -1.972214 | -0.255396 |
| 22 | 6 | 0 | 2.633733  | -0.730520 | -0.885605 |
| 23 | 1 | 0 | 2.912677  | -1.630590 | -1.437312 |
| 24 | 1 | 0 | 2.572499  | 0.090462  | -1.608917 |
| 25 | 6 | 0 | 3.774978  | -0.413892 | 0.068010  |
| 26 | 8 | 0 | 4.734845  | -1.180843 | 0.233085  |
| 27 | 7 | 0 | 3.657476  | 0.767010  | 0.704161  |
| 28 | 1 | 0 | 2.824818  | 1.338171  | 0.544078  |
| 29 | 1 | 0 | 4.348035  | 1.036550  | 1.388880  |
| 30 | 1 | 0 | -2.473264 | 1.421498  | -0.117617 |

-----

Ala-Gln-gas phase

-----

|    |   |   |           |           |           |
|----|---|---|-----------|-----------|-----------|
| 1  | 8 | 0 | -0.996896 | 2.164445  | -0.314916 |
| 2  | 6 | 0 | 0.147465  | 1.473506  | -0.314937 |
| 3  | 8 | 0 | 1.186871  | 2.011645  | -0.000845 |
| 4  | 6 | 0 | 0.103638  | 0.012520  | -0.820652 |
| 5  | 1 | 0 | 0.256818  | 0.086549  | -1.906266 |
| 6  | 7 | 0 | -3.641132 | 0.838543  | 0.151708  |
| 7  | 6 | 0 | -3.367640 | -0.568545 | 0.515292  |
| 8  | 1 | 0 | -3.706099 | -0.804766 | 1.530911  |
| 9  | 6 | 0 | -1.836105 | -0.642231 | 0.564969  |
| 10 | 8 | 0 | -1.223659 | -0.618329 | 1.621414  |
| 11 | 7 | 0 | -1.222628 | -0.566812 | -0.657770 |
| 12 | 1 | 0 | -1.831125 | -0.517301 | -1.462091 |
| 13 | 1 | 0 | -4.548923 | 0.935546  | -0.294025 |
| 14 | 1 | 0 | -3.652374 | 1.424311  | 0.982560  |
| 15 | 6 | 0 | 1.243591  | -0.833618 | -0.235200 |
| 16 | 1 | 0 | 1.301379  | -0.645689 | 0.839280  |
| 17 | 6 | 0 | -4.033239 | -1.525015 | -0.467358 |
| 18 | 1 | 0 | -3.728395 | -2.556982 | -0.274081 |
| 19 | 1 | 0 | -5.122255 | -1.471838 | -0.363391 |
| 20 | 1 | 0 | -3.792959 | -1.287066 | -1.510220 |
| 21 | 1 | 0 | 0.967177  | -1.885212 | -0.351110 |
| 22 | 6 | 0 | 2.601155  | -0.570358 | -0.927471 |
| 23 | 1 | 0 | 2.825948  | -1.356018 | -1.652378 |
| 24 | 1 | 0 | 2.572131  | 0.385963  | -1.460919 |
| 25 | 6 | 0 | 3.761672  | -0.524670 | 0.058099  |
| 26 | 8 | 0 | 4.579511  | -1.432070 | 0.162101  |
| 27 | 7 | 0 | 3.805432  | 0.607073  | 0.808938  |
| 28 | 1 | 0 | 3.079751  | 1.308676  | 0.731956  |
| 29 | 1 | 0 | 4.503464  | 0.678544  | 1.532524  |
| 30 | 1 | 0 | -1.806073 | 1.618601  | -0.441361 |



Pt(Ura)(AG)-gas phase

|    |    |   |           |           |           |
|----|----|---|-----------|-----------|-----------|
| 1  | 8  | 0 | -0.494082 | 0.351884  | -1.262593 |
| 2  | 6  | 0 | -1.501555 | -0.270090 | -0.682952 |
| 3  | 8  | 0 | -1.468872 | -1.348931 | -0.119335 |
| 4  | 6  | 0 | -2.786052 | 0.606753  | -0.752940 |
| 5  | 1  | 0 | -3.080123 | 0.690815  | -1.806372 |
| 6  | 7  | 0 | 0.573571  | 2.590011  | -0.333212 |
| 7  | 6  | 0 | -0.420557 | 3.104992  | 0.666112  |
| 8  | 1  | 0 | 0.068955  | 3.059842  | 1.641315  |
| 9  | 6  | 0 | -1.587334 | 2.107281  | 0.765586  |
| 10 | 8  | 0 | -1.733751 | 1.444651  | 1.778206  |
| 11 | 7  | 0 | -2.381940 | 1.970332  | -0.348497 |
| 12 | 1  | 0 | -2.098887 | 2.533046  | -1.138774 |
| 13 | 1  | 0 | 0.176752  | 2.658127  | -1.272818 |
| 14 | 1  | 0 | 1.388444  | 3.203540  | -0.316709 |
| 15 | 78 | 0 | 1.248098  | 0.603792  | -0.263802 |
| 16 | 7  | 0 | 3.339905  | -3.189051 | 0.059503  |
| 17 | 6  | 0 | 4.354127  | -2.655534 | 0.785676  |
| 18 | 1  | 0 | 5.132025  | -3.345145 | 1.097501  |
| 19 | 6  | 0 | 4.382140  | -1.327947 | 1.092574  |
| 20 | 1  | 0 | 5.178747  | -0.871288 | 1.662672  |
| 21 | 6  | 0 | 3.277023  | -0.572001 | 0.611238  |
| 22 | 8  | 0 | 3.081294  | 0.695300  | 0.753485  |
| 23 | 7  | 0 | 2.265850  | -1.141493 | -0.080929 |
| 24 | 6  | 0 | 2.240686  | -2.461776 | -0.461243 |
| 25 | 8  | 0 | 1.417669  | -3.009504 | -1.162576 |
| 26 | 1  | 0 | 3.338998  | -4.169529 | -0.186931 |
| 27 | 6  | 0 | -3.950635 | 0.038029  | 0.052304  |
| 28 | 1  | 0 | -3.590994 | -0.199719 | 1.056121  |
| 29 | 6  | 0 | -0.837148 | 4.537675  | 0.343992  |
| 30 | 1  | 0 | -1.548724 | 4.898561  | 1.092131  |
| 31 | 1  | 0 | 0.029289  | 5.208205  | 0.354662  |
| 32 | 1  | 0 | -1.315693 | 4.620888  | -0.638795 |
| 33 | 1  | 0 | -4.706253 | 0.821918  | 0.164076  |
| 34 | 6  | 0 | -4.574802 | -1.202422 | -0.627001 |
| 35 | 1  | 0 | -5.501743 | -0.943109 | -1.143377 |
| 36 | 1  | 0 | -3.882048 | -1.611805 | -1.372785 |
| 37 | 6  | 0 | -4.907861 | -2.321766 | 0.352707  |
| 38 | 8  | 0 | -6.060642 | -2.666996 | 0.596612  |
| 39 | 7  | 0 | -3.819333 | -2.901441 | 0.919110  |
| 40 | 1  | 0 | -2.885575 | -2.558290 | 0.715891  |
| 41 | 1  | 0 | -3.962285 | -3.620706 | 1.610260  |

Pt(Ura)(AG)-aqueous phase

|   |   |   |           |           |           |
|---|---|---|-----------|-----------|-----------|
| 1 | 8 | 0 | -0.538846 | 0.225238  | -1.239523 |
| 2 | 6 | 0 | -1.575219 | -0.323102 | -0.662361 |
| 3 | 8 | 0 | -1.611456 | -1.426868 | -0.123323 |
| 4 | 6 | 0 | -2.819958 | 0.606927  | -0.725628 |
| 5 | 1 | 0 | -3.098384 | 0.704303  | -1.781157 |
| 6 | 7 | 0 | 0.563347  | 2.549464  | -0.362254 |
| 7 | 6 | 0 | -0.404132 | 3.076855  | 0.656647  |
| 8 | 1 | 0 | 0.111569  | 3.048170  | 1.618125  |

|    |    |   |           |           |           |
|----|----|---|-----------|-----------|-----------|
| 9  | 6  | 0 | -1.543029 | 2.059333  | 0.766306  |
| 10 | 8  | 0 | -1.626425 | 1.322091  | 1.745701  |
| 11 | 7  | 0 | -2.368198 | 1.942891  | -0.313566 |
| 12 | 1  | 0 | -2.202169 | 2.580213  | -1.080017 |
| 13 | 1  | 0 | 0.163274  | 2.650877  | -1.297077 |
| 14 | 1  | 0 | 1.387244  | 3.152125  | -0.350386 |
| 15 | 78 | 0 | 1.235129  | 0.571131  | -0.268434 |
| 16 | 7  | 0 | 3.569071  | -3.100774 | 0.076764  |
| 17 | 6  | 0 | 4.578241  | -2.480639 | 0.737919  |
| 18 | 1  | 0 | 5.418229  | -3.107113 | 1.015799  |
| 19 | 6  | 0 | 4.522757  | -1.146344 | 1.019570  |
| 20 | 1  | 0 | 5.317783  | -0.625446 | 1.534430  |
| 21 | 6  | 0 | 3.350341  | -0.485795 | 0.579515  |
| 22 | 8  | 0 | 3.069627  | 0.772345  | 0.694383  |
| 23 | 7  | 0 | 2.345301  | -1.141570 | -0.050048 |
| 24 | 6  | 0 | 2.406477  | -2.467245 | -0.377376 |
| 25 | 8  | 0 | 1.557608  | -3.090477 | -1.007502 |
| 26 | 1  | 0 | 3.638199  | -4.087810 | -0.137652 |
| 27 | 6  | 0 | -4.022763 | 0.091425  | 0.063352  |
| 28 | 1  | 0 | -3.692727 | -0.162683 | 1.073442  |
| 29 | 6  | 0 | -0.833998 | 4.503447  | 0.330067  |
| 30 | 1  | 0 | -1.530833 | 4.865999  | 1.090708  |
| 31 | 1  | 0 | 0.035297  | 5.167551  | 0.323567  |
| 32 | 1  | 0 | -1.323273 | 4.580203  | -0.646675 |
| 33 | 1  | 0 | -4.737162 | 0.914216  | 0.160485  |
| 34 | 6  | 0 | -4.711567 | -1.113531 | -0.620369 |
| 35 | 1  | 0 | -5.633941 | -0.804281 | -1.115913 |
| 36 | 1  | 0 | -4.054595 | -1.534662 | -1.391104 |
| 37 | 6  | 0 | -5.061666 | -2.238056 | 0.340921  |
| 38 | 8  | 0 | -6.229925 | -2.581721 | 0.566055  |
| 39 | 7  | 0 | -3.997584 | -2.834404 | 0.916523  |
| 40 | 1  | 0 | -3.059138 | -2.497170 | 0.715374  |
| 41 | 1  | 0 | -4.140555 | -3.566468 | 1.596280  |

Pt(Ura)(GL)-gas phase

|    |    |   |           |           |           |
|----|----|---|-----------|-----------|-----------|
| 1  | 8  | 0 | 0.705774  | -0.177460 | -1.151092 |
| 2  | 6  | 0 | 1.573610  | 0.501398  | -0.406816 |
| 3  | 8  | 0 | 1.354153  | 1.502376  | 0.240093  |
| 4  | 6  | 0 | 2.958365  | -0.208940 | -0.416701 |
| 5  | 1  | 0 | 3.357252  | -0.149441 | -1.435629 |
| 6  | 7  | 0 | -0.152823 | -2.590529 | -0.528659 |
| 7  | 6  | 0 | 0.814974  | -3.091248 | 0.492559  |
| 8  | 1  | 0 | 1.292109  | -4.010662 | 0.126630  |
| 9  | 1  | 0 | 0.265831  | -3.308862 | 1.408444  |
| 10 | 6  | 0 | 1.849121  | -2.011909 | 0.830093  |
| 11 | 8  | 0 | 1.854942  | -1.492404 | 1.932223  |
| 12 | 7  | 0 | 2.691879  | -1.648882 | -0.194317 |
| 13 | 1  | 0 | 2.519899  | -2.136544 | -1.062815 |
| 14 | 1  | 0 | 0.318114  | -2.484151 | -1.428602 |
| 15 | 1  | 0 | -0.885002 | -3.287829 | -0.655809 |
| 16 | 78 | 0 | -1.054272 | -0.706834 | -0.310163 |
| 17 | 7  | 0 | -3.558351 | 2.806227  | 0.190213  |
| 18 | 6  | 0 | -4.542620 | 2.112798  | 0.815548  |
| 19 | 1  | 0 | -5.403141 | 2.690519  | 1.137683  |

|    |   |   |           |           |           |
|----|---|---|-----------|-----------|-----------|
| 20 | 6 | 0 | -4.443468 | 0.768301  | 1.013675  |
| 21 | 1 | 0 | -5.213238 | 0.185618  | 1.499584  |
| 22 | 6 | 0 | -3.242012 | 0.171929  | 0.536896  |
| 23 | 8 | 0 | -2.923690 | -1.076301 | 0.585271  |
| 24 | 7 | 0 | -2.263436 | 0.899684  | -0.045558 |
| 25 | 6 | 0 | -2.367451 | 2.239895  | -0.330878 |
| 26 | 8 | 0 | -1.586371 | 2.923077  | -0.956924 |
| 27 | 1 | 0 | -3.651272 | 3.798054  | 0.018832  |
| 28 | 6 | 0 | 3.964386  | 0.383543  | 0.568138  |
| 29 | 1 | 0 | 3.466912  | 0.498055  | 1.534927  |
| 30 | 1 | 0 | 4.772949  | -0.347621 | 0.703980  |
| 31 | 6 | 0 | 4.565933  | 1.730177  | 0.131396  |
| 32 | 1 | 0 | 3.734794  | 2.398384  | -0.126865 |
| 33 | 6 | 0 | 5.322790  | 2.359529  | 1.304401  |
| 34 | 6 | 0 | 5.486598  | 1.597770  | -1.086384 |
| 35 | 1 | 0 | 5.749667  | 3.329555  | 1.025277  |
| 36 | 1 | 0 | 4.659906  | 2.517646  | 2.161647  |
| 37 | 1 | 0 | 6.148649  | 1.714541  | 1.632537  |
| 38 | 1 | 0 | 6.333395  | 0.933626  | -0.868017 |
| 39 | 1 | 0 | 4.969235  | 1.199774  | -1.966917 |
| 40 | 1 | 0 | 5.896414  | 2.573114  | -1.372038 |

-----

Pt(Ura)(GL) - aqueous phase

-----

|    |    |   |           |           |           |
|----|----|---|-----------|-----------|-----------|
| 1  | 8  | 0 | 0.745149  | -0.031326 | -1.078057 |
| 2  | 6  | 0 | 1.656148  | 0.572820  | -0.345750 |
| 3  | 8  | 0 | 1.510367  | 1.607479  | 0.291227  |
| 4  | 6  | 0 | 3.006771  | -0.198304 | -0.371878 |
| 5  | 1  | 0 | 3.374552  | -0.157106 | -1.402669 |
| 6  | 7  | 0 | -0.138880 | -2.529581 | -0.543460 |
| 7  | 6  | 0 | 0.803833  | -3.047177 | 0.492785  |
| 8  | 1  | 0 | 1.296817  | -3.950137 | 0.115633  |
| 9  | 1  | 0 | 0.233076  | -3.293446 | 1.387135  |
| 10 | 6  | 0 | 1.800540  | -1.950005 | 0.843744  |
| 11 | 8  | 0 | 1.723433  | -1.346350 | 1.911309  |
| 12 | 7  | 0 | 2.685288  | -1.616210 | -0.138702 |
| 13 | 1  | 0 | 2.646924  | -2.178067 | -0.978086 |
| 14 | 1  | 0 | 0.341985  | -2.464556 | -1.441714 |
| 15 | 1  | 0 | -0.875255 | -3.223337 | -0.673956 |
| 16 | 78 | 0 | -1.047645 | -0.663598 | -0.302062 |
| 17 | 7  | 0 | -3.798819 | 2.695122  | 0.186751  |
| 18 | 6  | 0 | -4.782087 | 1.909976  | 0.694066  |
| 19 | 1  | 0 | -5.704217 | 2.415684  | 0.957064  |
| 20 | 6  | 0 | -4.602040 | 0.566173  | 0.847908  |
| 21 | 1  | 0 | -5.372151 | -0.084579 | 1.237772  |
| 22 | 6  | 0 | -3.333103 | 0.077057  | 0.451074  |
| 23 | 8  | 0 | -2.929880 | -1.151279 | 0.468394  |
| 24 | 7  | 0 | -2.359653 | 0.894741  | -0.019649 |
| 25 | 6  | 0 | -2.542208 | 2.234005  | -0.222844 |
| 26 | 8  | 0 | -1.722513 | 3.004176  | -0.714098 |
| 27 | 1  | 0 | -3.958648 | 3.687108  | 0.063736  |
| 28 | 6  | 0 | 4.073040  | 0.358905  | 0.572290  |
| 29 | 1  | 0 | 3.608029  | 0.556760  | 1.542427  |
| 30 | 1  | 0 | 4.823828  | -0.426867 | 0.729402  |
| 31 | 6  | 0 | 4.779826  | 1.628792  | 0.067243  |
| 32 | 1  | 0 | 4.008074  | 2.344456  | -0.246117 |

|    |   |   |          |          |           |
|----|---|---|----------|----------|-----------|
| 33 | 6 | 0 | 5.575698 | 2.268553 | 1.208892  |
| 34 | 6 | 0 | 5.695861 | 1.350279 | -1.129285 |
| 35 | 1 | 0 | 6.078605 | 3.183441 | 0.875935  |
| 36 | 1 | 0 | 4.925283 | 2.528261 | 2.051728  |
| 37 | 1 | 0 | 6.346686 | 1.581111 | 1.580489  |
| 38 | 1 | 0 | 6.490394 | 0.645092 | -0.853771 |
| 39 | 1 | 0 | 5.156233 | 0.926786 | -1.983575 |
| 40 | 1 | 0 | 6.174415 | 2.273488 | -1.474834 |

Pt(Ura)(GV)- gas phase

|    |    |   |           |           |           |
|----|----|---|-----------|-----------|-----------|
| 1  | 8  | 0 | 0.878166  | 0.214599  | -1.156379 |
| 2  | 6  | 0 | 1.596093  | 1.027598  | -0.388740 |
| 3  | 8  | 0 | 1.178344  | 1.912602  | 0.325549  |
| 4  | 6  | 0 | 3.101523  | 0.630065  | -0.462462 |
| 5  | 1  | 0 | 3.448459  | 0.798784  | -1.490345 |
| 6  | 7  | 0 | 0.549167  | -2.344884 | -0.620723 |
| 7  | 6  | 0 | 1.613519  | -2.658869 | 0.379496  |
| 8  | 1  | 0 | 2.267103  | -3.448593 | -0.015796 |
| 9  | 1  | 0 | 1.134206  | -3.011411 | 1.292659  |
| 10 | 6  | 0 | 2.406973  | -1.398418 | 0.739079  |
| 11 | 8  | 0 | 2.330210  | -0.919366 | 1.857234  |
| 12 | 7  | 0 | 3.136731  | -0.839746 | -0.281651 |
| 13 | 1  | 0 | 3.064655  | -1.329414 | -1.162497 |
| 14 | 1  | 0 | 0.976253  | -2.114820 | -1.519439 |
| 15 | 1  | 0 | -0.019550 | -3.177975 | -0.765727 |
| 16 | 78 | 0 | -0.726209 | -0.702319 | -0.335176 |
| 17 | 7  | 0 | -3.898554 | 2.191277  | 0.315020  |
| 18 | 6  | 0 | -4.713738 | 1.282756  | 0.907203  |
| 19 | 1  | 0 | -5.671786 | 1.656035  | 1.254829  |
| 20 | 6  | 0 | -4.338390 | -0.019976 | 1.044204  |
| 21 | 1  | 0 | -4.967272 | -0.769421 | 1.503584  |
| 22 | 6  | 0 | -3.043614 | -0.334242 | 0.542666  |
| 23 | 8  | 0 | -2.472908 | -1.490254 | 0.538731  |
| 24 | 7  | 0 | -2.242028 | 0.604384  | -0.007807 |
| 25 | 6  | 0 | -2.620487 | 1.906693  | -0.228935 |
| 26 | 8  | 0 | -2.000217 | 2.764689  | -0.818873 |
| 27 | 1  | 0 | -4.194363 | 3.149774  | 0.190407  |
| 28 | 6  | 0 | 4.006565  | 1.421025  | 0.492994  |
| 29 | 1  | 0 | 3.516341  | 1.429748  | 1.472221  |
| 30 | 6  | 0 | 5.382997  | 0.767591  | 0.632227  |
| 31 | 6  | 0 | 4.140177  | 2.865410  | -0.001118 |
| 32 | 1  | 0 | 5.313184  | -0.239580 | 1.052054  |
| 33 | 1  | 0 | 5.892619  | 0.696688  | -0.337985 |
| 34 | 1  | 0 | 6.017452  | 1.367395  | 1.293891  |
| 35 | 1  | 0 | 3.164524  | 3.348933  | -0.088292 |
| 36 | 1  | 0 | 4.746221  | 3.450314  | 0.699087  |
| 37 | 1  | 0 | 4.640559  | 2.901259  | -0.978557 |

Pt(Ura)(GV)- aqueous phase

|   |   |   |          |          |           |
|---|---|---|----------|----------|-----------|
| 1 | 8 | 0 | 0.900073 | 0.350103 | -1.077335 |
| 2 | 6 | 0 | 1.695871 | 1.068585 | -0.315323 |
| 3 | 8 | 0 | 1.363683 | 1.987131 | 0.421607  |
| 4 | 6 | 0 | 3.169577 | 0.580732 | -0.438756 |

|    |    |   |           |           |           |
|----|----|---|-----------|-----------|-----------|
| 5  | 1  | 0 | 3.473932  | 0.728891  | -1.482170 |
| 6  | 7  | 0 | 0.517344  | -2.294393 | -0.644136 |
| 7  | 6  | 0 | 1.563967  | -2.662148 | 0.356426  |
| 8  | 1  | 0 | 2.204124  | -3.447256 | -0.061688 |
| 9  | 1  | 0 | 1.070237  | -3.039814 | 1.250763  |
| 10 | 6  | 0 | 2.356151  | -1.415996 | 0.732002  |
| 11 | 8  | 0 | 2.218749  | -0.886343 | 1.832644  |
| 12 | 7  | 0 | 3.120846  | -0.880408 | -0.260034 |
| 13 | 1  | 0 | 3.159185  | -1.405771 | -1.122266 |
| 14 | 1  | 0 | 0.958696  | -2.108424 | -1.545710 |
| 15 | 1  | 0 | -0.074976 | -3.111554 | -0.791737 |
| 16 | 78 | 0 | -0.727275 | -0.644323 | -0.324046 |
| 17 | 7  | 0 | -4.057547 | 2.107209  | 0.298296  |
| 18 | 6  | 0 | -4.865822 | 1.133763  | 0.787953  |
| 19 | 1  | 0 | -5.863475 | 1.446056  | 1.075020  |
| 20 | 6  | 0 | -4.432017 | -0.155468 | 0.895723  |
| 21 | 1  | 0 | -5.059013 | -0.952442 | 1.270193  |
| 22 | 6  | 0 | -3.099337 | -0.381844 | 0.472465  |
| 23 | 8  | 0 | -2.468670 | -1.510314 | 0.445665  |
| 24 | 7  | 0 | -2.306097 | 0.620997  | 0.021304  |
| 25 | 6  | 0 | -2.742775 | 1.906391  | -0.137623 |
| 26 | 8  | 0 | -2.091552 | 2.832179  | -0.612645 |
| 27 | 1  | 0 | -4.405487 | 3.053815  | 0.209799  |
| 28 | 6  | 0 | 4.170355  | 1.320968  | 0.463457  |
| 29 | 1  | 0 | 3.727180  | 1.388959  | 1.463199  |
| 30 | 6  | 0 | 5.498069  | 0.566558  | 0.563217  |
| 31 | 6  | 0 | 4.402121  | 2.739466  | -0.068590 |
| 32 | 1  | 0 | 5.369053  | -0.425799 | 1.004229  |
| 33 | 1  | 0 | 5.956769  | 0.439381  | -0.425546 |
| 34 | 1  | 0 | 6.202577  | 1.127690  | 1.186719  |
| 35 | 1  | 0 | 3.466469  | 3.298447  | -0.151469 |
| 36 | 1  | 0 | 5.069012  | 3.292721  | 0.601355  |
| 37 | 1  | 0 | 4.876133  | 2.710348  | -1.058331 |

-----

<sup>w</sup>Pt(Ura)(GV)

-----

|    |    |   |           |           |           |
|----|----|---|-----------|-----------|-----------|
| 1  | 8  | 0 | 0.765367  | 0.396344  | -1.171068 |
| 2  | 6  | 0 | 1.652515  | 1.056917  | -0.471854 |
| 3  | 8  | 0 | 1.440221  | 2.003973  | 0.280021  |
| 4  | 6  | 0 | 3.072701  | 0.460005  | -0.678980 |
| 5  | 1  | 0 | 3.301391  | 0.542804  | -1.748578 |
| 6  | 7  | 0 | 0.252808  | -2.256129 | -0.593398 |
| 7  | 6  | 0 | 1.303853  | -2.614013 | 0.402884  |
| 8  | 1  | 0 | 1.864657  | -3.482251 | 0.037611  |
| 9  | 1  | 0 | 0.825428  | -2.868582 | 1.347619  |
| 10 | 6  | 0 | 2.215483  | -1.418473 | 0.637724  |
| 11 | 8  | 0 | 2.217639  | -0.844372 | 1.731873  |
| 12 | 7  | 0 | 2.914609  | -0.985294 | -0.438471 |
| 13 | 1  | 0 | 2.786438  | -1.525143 | -1.292467 |
| 14 | 1  | 0 | 0.685352  | -2.222999 | -1.526351 |
| 15 | 1  | 0 | -0.409833 | -3.030930 | -0.627866 |
| 16 | 78 | 0 | -0.879959 | -0.517327 | -0.366192 |
| 17 | 7  | 0 | -4.094473 | 2.405126  | 0.077568  |
| 18 | 6  | 0 | -4.954543 | 1.495510  | 0.599029  |
| 19 | 1  | 0 | -5.941931 | 1.865609  | 0.850192  |
| 20 | 6  | 0 | -4.579116 | 0.195290  | 0.779886  |

|    |   |   |           |           |           |
|----|---|---|-----------|-----------|-----------|
| 21 | 1 | 0 | -5.247873 | -0.552872 | 1.181690  |
| 22 | 6 | 0 | -3.253613 | -0.108511 | 0.392326  |
| 23 | 8 | 0 | -2.668160 | -1.265031 | 0.427295  |
| 24 | 7 | 0 | -2.407942 | 0.831775  | -0.093954 |
| 25 | 6 | 0 | -2.786414 | 2.122186  | -0.315221 |
| 26 | 8 | 0 | -2.079808 | 2.996666  | -0.819152 |
| 27 | 1 | 0 | -4.396098 | 3.361401  | -0.064320 |
| 28 | 6 | 0 | 4.197705  | 1.151502  | 0.104357  |
| 29 | 1 | 0 | 3.858459  | 1.276503  | 1.138539  |
| 30 | 6 | 0 | 5.476023  | 0.309820  | 0.099159  |
| 31 | 6 | 0 | 4.470740  | 2.537831  | -0.489738 |
| 32 | 1 | 0 | 5.323360  | -0.665848 | 0.569299  |
| 33 | 1 | 0 | 5.831337  | 0.138242  | -0.924735 |
| 34 | 1 | 0 | 6.270939  | 0.830542  | 0.643757  |
| 35 | 1 | 0 | 3.572472  | 3.160557  | -0.496802 |
| 36 | 1 | 0 | 5.237641  | 3.057129  | 0.094693  |
| 37 | 1 | 0 | 4.839762  | 2.453145  | -1.520047 |
| 38 | 8 | 0 | -0.021089 | 4.422189  | 0.529612  |
| 39 | 1 | 0 | -0.829367 | 4.117881  | 0.084080  |
| 40 | 1 | 0 | 0.540138  | 3.627553  | 0.497286  |
| 41 | 1 | 0 | 3.396209  | -0.346295 | 3.085760  |
| 42 | 8 | 0 | 3.909166  | -0.147939 | 3.890392  |
| 43 | 1 | 0 | 4.824236  | -0.079153 | 3.596991  |
| 44 | 8 | 0 | 2.048844  | -2.384379 | -2.937744 |
| 45 | 1 | 0 | 2.339701  | -3.239569 | -3.277847 |
| 46 | 1 | 0 | 1.929421  | -1.820235 | -3.711979 |
| 47 | 1 | 0 | -3.223708 | -2.899206 | 1.203636  |
| 48 | 8 | 0 | -3.497925 | -3.762550 | 1.559578  |
| 49 | 1 | 0 | -3.202364 | -3.762717 | 2.476744  |

---

## REFERENCES

- (1) Rappe, A. K., Casewit, C. J.; Colwell, K. S., Goddard III, W. A., Skiff, W. M. UFF, a Full Periodic Table Force Field for Molecular Mechanics and Molecular Dynamics Simulations. *J. Am. Chem. Soc.* **1992**, 114, 10024–10035
- (2) Thompson, M. ArgusLab 4.0, Planaria Software LLC, Seattle, <http://www.ArgusLab.com>.
